# Supplementary material
Source: PubMed Central journal article supplement (PMC7309091)
Supplement: jamapediatr-174-e201749-s001.pdf [file jamapediatr-174-e201749-s001.pdf]

## Supplementary Online Content

Yang S-W, Kernic MA, Mueller BA, Simon GE, Chan KCG, Vander Stoep A. Association of parental mental illness with child injury occurrence, hospitalization, and death during early childhood. *JAMA Pediatr*. Published online June 22, 2020. doi:10.1001/jamapediatrics.2020.1749

**eMethods 1.** Deterministic Linkage Methods for Forming Complete Child-Father-Mother Triads Registry of Beneficiaries and Birth Certificate

**eMethods 2.** Construction of Study Cohort

**eMethods 3.** Characteristics of Children of the Study Cohort and Children Excluded From the Study Cohort, 2004-2014

**eMethods 4.** Retrieving Child's Health Records Under the Parents' Coverage

**eMethods 5.** Retrieval of Prenatal and Well-Child Visits

**eMethods 6.** Retrieval of Covariates

**eMethods 7.** Associations Between Childhood Injury Events in the First Five Years of Life and Covariates Among Children in the Study Cohort

**eMethods 8.** Associations Between Injury Hospitalization in the First Five Years of Life and Covariates Among Children in the Study Cohort

**eMethods 9.** Variables Used for the Adjustment in All Models

**eMethods 10.** Missing Data of Child's Birthweight, Gestational Age and Parental Demographics Among Children in the Study Cohort

**eMethods 11.** ICD-9-CM Diagnostic Codes of Child Complex Chronic Conditions

**eMethods 12.** Number of Children and Any Child Injury Event Excluded in Sensitivity Analyses

**eFigure 1.** Interval Between Two Clinical Visits (in Week) by Injury Type

**eFigure 2.** Numbers and Days of Enrollment Gaps for Children and Parents in the Study Cohort

**eTable 1.** Incidence Rates of Injury Healthcare Visits Among Children in the Study Cohort, Stratified by Child Age and by Exposure to Parental Serious Mental Illness

**eTable 2.** Incidence Rates of Injury Events Among Children in the Study Cohort, Stratified by Child Age and by Exposure to Parental Serious Mental Illness for Each Injury Type

**eTable 3.** Sensitivity Analyses of Associations Between Parental Serious Mental Illness and Any Childhood Injury Event

**eTable 4.** ICD-9 E Codes for Individual Hospitalization Associated With Injury ICD-9 Diagnostic Codes

**Table 5.** ICD-9 external causes of injury deaths

**eTable 6.** Utilization of Preventive Health Services Among Children in the Study Cohort Born in 2004-2009

**eReferences**

This supplementary material has been provided by the authors to give readers additional information about their work.



## **eMethods 1 Deterministic linkage methods for forming complete child-father-mother triads registry of beneficiaries and birth certificate**

The MCHD was developed based on the birth registry of 2004-2014 held by the Department of Household Registration. IDs for foreign parents in the birth registry are sequential numbers assigned by each county, instead of foreign IDs. To facilitate linkage across databases, the Data Science Center collaborated with researchers to replace foreign mother's sequential numbers with foreign IDs.<sup>1</sup> During data screening process, we found that foreign-born parents could have multiple IDs because their foreign IDs would be changed to national IDs after receiving citizenship. However, for foreign mothers, the algorithm used to develop the MCHD only retrieved a single ID from the registry of beneficiaries of the NHRID or the birth certificate. To decrease the nonlinkages, we retrieved child-parent pairs from the registry of beneficiaries of 2000-2014 using the variable specifying the relationship between the insured and the enrollee. Among the retrieved pairs, if an ID was associated with multiple IDs documented as spouse (or as father/mother) and all these IDs had the same birthdate, then these multiple IDs were considered to belong to the same person.

Among the retrieved spouse and child-parent pairs from the registry of beneficiaries of the NHRID, if an ID was associated with multiple IDs documented as spouse (or as father/mother) and all these IDs had the same birthdate, then these multiple IDs were considered to belong to the same person. We created a unique indicator for these multiple IDs. There were 172,958 female and 13,471 male indicators associated with multiple IDs. Most of these IDs that apparently belonged to the same person did not occur in the registry of beneficiaries for a given year. In the registry of beneficiaries, the sex is recorded as unknown (value: 9) for a foreign ID. We employed several pieces of information to help determine the sex for these IDs: the sex of the other person in the spouse pairs, whether the ID existed as a mother's ID in the birth certificate database, and whether the ID was part of multiple IDs belonging to a same person.

Two deterministic linkage methods were used to form complete child-father-mother triads. In the first method, the spouse pairs were first linked to the birth certificate to retrieve their children's birthdates by matching on mother's ID and father's birthdate. Then these matched records were linked to the child-parent pairs by matching on parent's ID and child's birthdate. In the second method, the child-father pairs and child-mother pairs in the registry of beneficiaries were matched on child's ID. Among the retrieved child-parent pairs, if a child ID was associated with multiple mother's (or father's) IDs, and the birthdates of these parents' IDs were different, then the parent's IDs of the parent-child pairs that appeared later in the registry of beneficiaries were removed. The later- appearing parent's IDs could be stepparent's IDs. Finally, the parent-child pairs/triads of interest were restricted to children born between 2004-2014. Totally, we retrieved 2,225,067 children with Taiwanese citizenship and born between 2004-2014 from the registry of beneficiaries. Most (95%) of the child's IDs also existed in the MCHD.

There were 2,282,532 children associated with at least one parent's ID in the MCHD and/or the registry of beneficiaries. Most of the child's IDs (2,112,714 [92.6%]) existed both in the MCHD and the registry of beneficiaries; and 59,017 (2.6%) and 110,801 (4.9%) only in the MCHD and only in the registry of beneficiaries, respectively. Among the child's IDs only existing in the MCHD, 33,565 (56.9%) could not be linked to the registry of beneficiaries, and 11,301 (19.1%) were associated with a date of birth earlier than 2004. (The date of birth was retrieved from the registry of beneficiaries.) For the child's IDs only existing in the registry of beneficiaries, 38,185 (34.5%) had both mother's and father's IDs retrieved from the registry of beneficiaries, 38,105 (34.4%) only had mother's IDs, and 34,511 (31.1%) only had father's IDs.

The parent's IDs in the MCHD were compared with those in the registry of beneficiaries (see the below table). For child's IDs with a missing parent's ID in the MCHD, 610 and 25,870 had mother's and father's IDs, respectively, retrieved from the registry of beneficiaries. Among child's IDs in the MCHD, 78.1% had a single retrieved mother's ID agreeing with that in the MCHD; 4.7% had multiple retrieved mother's IDs of which one was the same as that in the MCHD; and only 0.4% had different mother's IDs. As for father's IDs, 68.4% of child's IDs had a single retrieved father's ID agreeing with that in the MCHD; 0.1% had multiple father's IDs of which one was the same as that in the MCHD; and only 0.5% had different father's IDs. Overall, parents' IDs retrieved from the registry of beneficiaries were highly concordant with parent's IDs in the MCHD were: 99.5% and 99.2% of the retrieved mother's and father's IDs were the same as those in the MCHD.

**Results of comparing parents' IDs in the parent-child pairs between the MCHD and the registry of beneficiaries**

| Results of comparison                                     |                                                          | Mother's ID        |        | Father's ID        |        |
|-----------------------------------------------------------|----------------------------------------------------------|--------------------|--------|--------------------|--------|
|                                                           |                                                          | Number of children | %      | Number of children | %      |
| ID is missing in both data sources                        |                                                          | 447                | 0.02   | 60,909             | 2.80   |
| No ID retrieved from the registry of beneficiaries        |                                                          | 363,327            | 16.73  | 585,470            | 26.96  |
| Single ID retrieved from the registry of beneficiaries    | ID is missing in the MCHD                                | 552                | 0.03   | 25,718             | 1.18   |
|                                                           | ID is different in two data sources                      | 6,570              | 0.30   | 10,385             | 0.48   |
|                                                           | ID is the same in two data sources                       | 1,696,461          | 78.12  | 1,484,679          | 68.36  |
| Multiple IDs retrieved from the registry of beneficiaries | ID is missing in the MCHD                                | 58                 | 0.00   | 152                | 0.01   |
|                                                           | The retrieved IDs are different from that in the MCHD    | 3,063              | 0.14   | 1,307              | 0.06   |
|                                                           | One of the retrieved IDs is the same as that in the MCHD | 101,253            | 4.66   | 3,111              | 0.14   |
| Sum                                                       |                                                          | 2,171,731          | 100.00 | 2,171,731          | 100.00 |

## eMethods 2 Construction of study cohort

Three data sources were used to construct the study cohort: the parent-child pairs/triads in the MCHD, the parent-child pairs/triads retrieved from the registry of beneficiaries, and the birth certificate database. The following table briefly describes characteristics of children in terms of birth years, health insurance enrollment, and nationality in each data source. The sample frame for the study cohort was children (1) with Taiwan citizenship, (2) born 2004-2014, and (3) included either in the MCHD or the registry of beneficiaries.

### Data sources for constructing the study cohort

The dark yellow color indicates children with Taiwan citizenship and born 2004-2014.

#### (1) Parent-child pairs/triads in the MCHD

|                                                                                                                         |                                                                                    |                                                                                                                                   |                                                               |
|-------------------------------------------------------------------------------------------------------------------------|------------------------------------------------------------------------------------|-----------------------------------------------------------------------------------------------------------------------------------|---------------------------------------------------------------|
| Children with Taiwan citizenship born between 2004-2014 and enrolled in the NHI program during 2004-2014<br>N=2,126,865 |                                                                                    | Children with Taiwan citizenship but not enrolled in the NHI program during 2004-2014 (unknown children's birthdates)<br>N=33,565 | Children with Taiwan citizenship born before 2004<br>N=11,301 |
| Children having been enrolled as a dependent of one of the parents<br>N=2,112,714                                       | Children having not been enrolled as a dependent of one of the parents<br>N=14,151 |                                                                                                                                   |                                                               |

Birthdates for child's and parent's IDs in the MCHD were extracted from the registry of beneficiaries.

#### (2) Parent-child pairs/triads retrieved from the registry of beneficiaries

|                                                                                                                                                      |                                                   |                                                                                                                                                                                                           |
|------------------------------------------------------------------------------------------------------------------------------------------------------|---------------------------------------------------|-----------------------------------------------------------------------------------------------------------------------------------------------------------------------------------------------------------|
| Children with Taiwan citizenship born during 2004-2014 who had been enrolled as a dependent of one of the parents in the NHI program.<br>N=2,223,515 |                                                   | Children (1) had Taiwan citizenship, (2) were born during 2004-2014, (3) had not been enrolled as a dependent of one of the parents in the NHI program, and (4) were not included in the MCHD.<br>N=1,552 |
| Child's IDs included in the MCHD<br>N=2,112,714                                                                                                      | Child's IDs not included in the MCHD<br>N=110,801 |                                                                                                                                                                                                           |

#### (3) Birth certificate

|                                                                            |                                                                      |                         |
|----------------------------------------------------------------------------|----------------------------------------------------------------------|-------------------------|
| Live-born infants with Taiwan citizenship born in 2004-2014<br>N=2,225,131 | Live-born infants without Taiwan citizenship <sup>#</sup><br>N=2,977 | Stillbirths<br>N=24,456 |
|----------------------------------------------------------------------------|----------------------------------------------------------------------|-------------------------|

<sup>#</sup> defined by two variables in the birth certificate: 1. mother's ID was foreign ID (the variable ID\_ROC\_M), and 2. father's original nationality was non-Taiwanese

Exact deterministic linkage was used to match records between the parent-child pairs/triads in the MCHD and/or the registry of beneficiaries and the birth certificate database. We first performed the linking by matching on mother's ID, child's birthdate, child sex, and father's birthdate; and then by matching on mother's ID, child's birthdate, child sex for the remaining unmatched records. For child's IDs in the MCHD that could not retrieve their birthdates from the registry of beneficiaries (n=33,565), we first used mother's ID and father's birthdate as the key variables to link the data. For the remaining unmatched records, the child's birth year was estimated from the variables "visit date" and "age" in the inpatient and ambulatory care expenditure datasets; and child's death year was estimated from the variable "date of death" in the death certificate database. Then we used mother's ID, child's birth year (or death year), and/or father's birthdate as the key variables.

For child's IDs existing in the MCHD, if their father's IDs in the MCHD were missing or could not be linked to the registry of beneficiaries, the birthdates of the father's IDs retrieved from the registry of beneficiaries were employed in the above matching process. Similarly, if child's IDs could not be matched to birth certificate records by using their mother's IDs in the MCHD, the retrieved mother's ID from the registry of beneficiaries was used as the key variable.

In the linking process, if the following two conditions were met, then the records were considered unmatched: (1) if a child's ID was matched to different birth events, or (2) the number of child's IDs in a birth event was larger than that of records

in a birth event. These two conditions mostly occurred in the situation when children's birthdates were missing, and mother's ID and father's birthdate were used as the key variables.

Most (91%) of the matched records were obtained by matching on mother's ID, child's birthdate, child sex, and father's birthdate. Overall, 96.8% of parent-child pairs/triads had a matched birth certificate record; and 98.7% of livebirth records in the birth certificate database had a matched parent-child pairs/triad. Among the child-parent pairs/triads with a matched birth certificate record, if a child's ID was associated with multiple father's (or mother's) IDs that had different birthdates, we only kept the IDs that had the same birthdate as that in the birth certificate record. If the multiple mother's IDs had the same birthdate, but these IDs co-existed in more than 30 datasets of the registry of beneficiaries, we also only kept the mother's IDs that existed in the birth certificate. In total, there were 2,272,783 unique child's IDs, 1,535,873 unique mother's IDs, and 1,493,683 unique father's IDs. Very few children had multiple father's IDs, and most (98.4%) of the children with multiple mother's IDs were ultimately found to involve foreign-born mothers.

**eMethods 3 Characteristics of children of the study cohort and children excluded from the study cohort, 2004-2014**

|                                   | The study cohort |       | Children excluded from the study cohort |       |                                |       |
|-----------------------------------|------------------|-------|-----------------------------------------|-------|--------------------------------|-------|
|                                   |                  |       | With a matched birth record             |       | Without a matched birth record |       |
|                                   | N                | %     | N                                       | %     | N                              | %     |
| <b>Birth year</b>                 |                  |       |                                         |       |                                |       |
| <i>Missing</i>                    |                  |       |                                         |       | 5,427                          |       |
| 2004-2007                         | 768,330          | 38.43 | 56,126                                  | 28.13 | 27,700                         | 40.42 |
| 2008-2010                         | 504,907          | 25.25 | 45,823                                  | 22.97 | 18,155                         | 26.49 |
| 2011-2014                         | 726,085          | 36.32 | 97,547                                  | 48.90 | 22,683                         | 33.10 |
| <b>Children's characteristics</b> |                  |       |                                         |       |                                |       |
| <b>Child sex</b>                  |                  |       |                                         |       |                                |       |
| <i>Missing</i>                    |                  |       | 2                                       |       | 5,427                          |       |
| Female                            | 956,988          | 47.87 | 96,379                                  | 48.31 | 33,266                         | 48.54 |
| Males                             | 1,042,334        | 52.13 | 103,115                                 | 51.69 | 35,272                         | 51.46 |
| <b>Low birthweight</b>            |                  |       |                                         |       |                                |       |
| <i>Missing</i>                    |                  |       |                                         |       | 73,965                         |       |
| No                                | 1,882,131        | 94.14 | 141,499 <sup>a</sup>                    | 70.93 |                                |       |
| Yes                               | 117,191          | 5.86  | 57,997 <sup>a</sup>                     | 29.07 |                                |       |
| <b>Preterm birth</b>              |                  |       |                                         |       |                                |       |
| <i>Missing</i>                    |                  |       |                                         |       | 73,965                         |       |
| No                                | 1,860,620        | 93.06 | 142,806                                 | 71.58 |                                |       |
| Yes                               | 138,702          | 6.94  | 56,690                                  | 28.42 |                                |       |
| <b>Birth order</b>                |                  |       |                                         |       |                                |       |
| <i>Missing</i>                    |                  |       |                                         |       | 1,684                          |       |
| 1                                 | 1,124,952        | 56.27 | 103,123                                 | 51.69 | 47,323                         | 65.47 |
| 2                                 | 703,780          | 35.20 | 68,486                                  | 34.33 | 19,648                         | 27.18 |
| >=3                               | 170,590          | 8.53  | 27,887                                  | 13.98 | 5,310                          | 7.35  |
| <b>Complex chronic conditions</b> |                  |       |                                         |       |                                |       |
| <i>Missing</i>                    |                  |       | 10,144                                  |       | 4,918                          |       |
| No                                | 1,866,333        | 93.35 | 169,773                                 | 89.66 | 67,106                         | 97.19 |
| Yes                               | 132,989          | 6.65  | 19,579                                  | 10.34 | 1,941                          | 2.81  |
| <b>Parental characteristics</b>   |                  |       |                                         |       |                                |       |
| <b>Paternal age</b>               |                  |       |                                         |       |                                |       |
| <i>Missing</i>                    |                  |       | 81,562                                  |       | 22,704                         |       |
| <25                               | 101,829          | 5.09  | 4,654                                   | 3.95  | 1,058                          | 2.06  |
| 25-29                             | 438,192          | 21.92 | 21,995                                  | 18.65 | 6,931                          | 13.52 |
| 30-34                             | 765,790          | 38.30 | 44,832                                  | 38.01 | 17,296                         | 33.74 |
| 35-39                             | 478,869          | 23.95 | 32,091                                  | 27.21 | 14,115                         | 27.54 |
| 40-44                             | 159,561          | 7.98  | 10,450                                  | 8.86  | 7,009                          | 13.67 |
| >=45                              | 55,081           | 2.75  | 3,912                                   | 3.32  | 4,852                          | 9.47  |
| <b>Maternal age</b>               |                  |       |                                         |       |                                |       |
| <i>Missing</i>                    |                  |       |                                         |       | 42,967                         |       |
| <20                               | 35,620           | 1.78  | 8,211                                   | 4.12  | 411                            | 1.33  |
| 20-24                             | 262,663          | 13.14 | 21,648                                  | 10.85 | 4,306                          | 13.89 |
| 25-29                             | 671,482          | 33.59 | 53,453                                  | 26.79 | 8,126                          | 26.21 |
| 30-34                             | 729,222          | 36.47 | 73,900                                  | 37.04 | 11,773                         | 37.98 |
| 35-39                             | 263,861          | 13.20 | 35,951                                  | 18.02 | 5,351                          | 17.26 |
| >=40                              | 36,474           | 1.82  | 6,333                                   | 3.17  | 1,031                          | 3.33  |
| <b>Unmarried mother</b>           |                  |       |                                         |       |                                |       |
| <i>Missing</i>                    |                  |       |                                         |       | 73,965                         |       |
| No                                | 1,935,304        | 96.80 | 137,293                                 | 68.82 |                                |       |

|                                                       | The study cohort |       | Children excluded from the study cohort |       |                                |       |
|-------------------------------------------------------|------------------|-------|-----------------------------------------|-------|--------------------------------|-------|
|                                                       |                  |       | With a matched birth record             |       | Without a matched birth record |       |
|                                                       | N                | %     | N                                       | %     | N                              | %     |
| Yes                                                   | 64,018           | 3.20  | 62,203                                  | 31.18 |                                |       |
| Foreign-born mother                                   |                  |       |                                         |       |                                |       |
| Missing                                               |                  |       |                                         |       | 37,830                         |       |
| No                                                    | 1,804,688        | 90.26 | 185,724                                 | 93.10 | 26,563                         | 73.51 |
| Yes                                                   | 194,634          | 9.74  | 13,772                                  | 6.90  | 9,572                          | 26.49 |
| <b>Socio-economic status</b>                          |                  |       |                                         |       |                                |       |
| Urbanicity of residence                               |                  |       |                                         |       |                                |       |
| Missing                                               | 13               |       | 22                                      |       | 73,965                         |       |
| 1 (highest urbanicity)                                | 404,799          | 20.25 | 42,751                                  | 21.43 |                                |       |
| 2                                                     | 645,763          | 32.30 | 67,635                                  | 33.91 |                                |       |
| 3                                                     | 471,912          | 23.60 | 44,413                                  | 22.27 |                                |       |
| 4                                                     | 287,070          | 14.36 | 25,868                                  | 12.97 |                                |       |
| 5                                                     | 33,169           | 1.66  | 2,659                                   | 1.33  |                                |       |
| 6                                                     | 69,099           | 3.46  | 7,208                                   | 3.61  |                                |       |
| 7                                                     | 87,497           | 4.38  | 8,940                                   | 4.48  |                                |       |
| Family income                                         |                  |       |                                         |       |                                |       |
| Missing                                               | 4,037            |       | 9,530                                   |       | 9,724                          |       |
| High                                                  | 360,582          | 18.07 | 20,804                                  | 10.95 | 3,680                          | 5.73  |
| Upper-middle                                          | 404,735          | 20.28 | 17,995                                  | 9.47  | 4,658                          | 7.25  |
| Middle                                                | 427,217          | 21.41 | 22,819                                  | 12.01 | 7,151                          | 11.13 |
| Lower-middle                                          | 401,114          | 20.10 | 35,185                                  | 18.52 | 13,959                         | 21.73 |
| Low                                                   | 401,637          | 20.13 | 93,163                                  | 49.04 | 34,793                         | 54.16 |
| Paternal occupation                                   |                  |       |                                         |       |                                |       |
| Missing                                               | 28,001           |       | 120,617                                 |       | 24,496                         |       |
| Civil servants and teachers                           | 111,993          | 5.68  | 5,529                                   | 7.01  | 1,856                          | 3.75  |
| Employees, employers and professionals                | 1,487,630        | 75.46 | 59,838                                  | 75.86 | 31,483                         | 63.64 |
| Union members, farmers and fishermen                  | 109,084          | 5.53  | 3,681                                   | 4.67  | 3,135                          | 6.34  |
| The unemployed and low-income households              | 197,877          | 10.04 | 7,542                                   | 9.56  | 12,174                         | 24.61 |
| Dependents                                            | 64,737           | 3.28  | 2,289                                   | 2.90  | 821                            | 1.66  |
| Maternal occupation                                   |                  |       |                                         |       |                                |       |
| Missing                                               | 8,523            |       | 15,245                                  |       | 47,016                         |       |
| Civil servants and teachers                           | 108,535          | 5.45  | 9,429                                   | 5.12  | 1,232                          | 4.57  |
| Employees, employers and professionals                | 1,253,228        | 62.95 | 106,205                                 | 57.64 | 10,691                         | 39.67 |
| Union members, farmers and fishermen                  | 69,141           | 3.47  | 5,799                                   | 3.15  | 343                            | 1.27  |
| The unemployed and low-income households              | 135,476          | 6.81  | 44,171                                  | 23.97 | 7,505                          | 27.85 |
| Dependents                                            | 424,419          | 21.32 | 18,647                                  | 10.12 | 7,178                          | 26.64 |
| <b>Parental physical illness</b>                      |                  |       |                                         |       |                                |       |
| Paternal Elixhauser index                             |                  |       |                                         |       |                                |       |
| Missing                                               |                  |       | 90,262                                  |       | 19,286                         |       |
| 0                                                     | 1,871,469        | 93.61 | 101,459                                 | 92.88 | 51,488                         | 94.16 |
| 1                                                     | 99,306           | 4.97  | 5,955                                   | 5.45  | 2,340                          | 4.28  |
| >1                                                    | 28,547           | 1.43  | 1,820                                   | 1.67  | 851                            | 1.56  |
| Maternal Elixhauser index                             |                  |       |                                         |       |                                |       |
| Missing                                               |                  |       | 4,127                                   |       | 37,853                         |       |
| 0                                                     | 1,911,647        | 95.61 | 183,384                                 | 93.87 | 35,668                         | 98.77 |
| 1                                                     | 78,270           | 3.91  | 10,664                                  | 5.46  | 390                            | 1.08  |
| >1                                                    | 9,405            | 0.47  | 1,321                                   | 0.68  | 54                             | 0.15  |
| <b>Death occurred in the first five years of life</b> |                  |       |                                         |       |                                |       |



|                | The study cohort |       | Children excluded from the study cohort |       |                                |       |
|----------------|------------------|-------|-----------------------------------------|-------|--------------------------------|-------|
|                |                  |       | With a matched birth record             |       | Without a matched birth record |       |
|                | N                | %     | N                                       | %     | N                              | %     |
| Paternal death |                  |       |                                         |       |                                |       |
| No             | 1,990,599        | 99.56 | 199,111                                 | 99.81 | 73,698                         | 99.64 |
| Yes            | 8,723            | 0.44  | 385                                     | 0.19  | 267                            | 0.36  |
| Maternal death |                  |       |                                         |       |                                |       |
| No             | 1,996,857        | 99.88 | 199,139                                 | 99.82 | 73,940                         | 99.97 |
| Yes            | 2,465            | 0.12  | 357                                     | 0.18  | 25                             | 0.03  |
| Child's death  |                  |       |                                         |       |                                |       |
| No             | 1,993,379        | 99.70 | 194,597                                 | 97.54 | 73,849                         | 99.84 |
| Yes            | 5,943            | 0.30  | 4,899                                   | 2.46  | 116                            | 0.16  |

<sup>a</sup> For the same-sex multiples, it was difficult to assign birthweight because the MCHD and the registry of beneficiaries had no indicator of birth order for each child's ID. So, birthweight for same-sex twins/triplets was assigned with the mean of their birthweights.

The excluded children were more likely to be born prematurely and have LBW or CCC, which probably resulted from the exclusion of twins/multiples. They were more likely to die during study follow-up (5,051 [1.8%]) compared to children in the study cohort (5,943 [0.3%]). Families of the excluded children tended to have lower income. The presence of maternal SMI was associated with whether a mother-father-child triad could be identified. Among 111,406 mother-child pairs matched to birth certificates that had a missing/unlinkable father's ID, 5.2% had maternal SMI, which was greater than the complete mother-father-child triads (2.9%).

### Incidence rates of childhood injury events in the first five years of life, stratified by whether a child was included in the study population or matched to a birth certificate record

|                        | Children <sup>b</sup> (N) | Episodes (n) | Person-years <sup>c</sup> | Incidence rate <sup>d</sup> (95% CI) |
|------------------------|---------------------------|--------------|---------------------------|--------------------------------------|
| Study population       | 1,999,322                 | 1,993,821    | 7,741,026.33              | 257.6 (257.2-257.9)                  |
| Matched <sup>a</sup>   | 199,496                   | 157,855      | 655,272.85                | 240.9 (239.7-242.1)                  |
| Unmatched <sup>a</sup> | 73,965                    | 39,214       | 276,499.52                | 141.8 (140.4-143.2)                  |

Abbreviation: CI: Confidence intervals

<sup>a</sup> Matched: children with a matched birth certificate record but not included in the study population; unmatched: children without a matched birth record. The matched group could have a slightly inflated incidence rate because the records in the first 90 days of life could not be assigned exactly to a child's ID.

<sup>b</sup> Number of children with Taiwanese citizenship born in 2004-2014.

<sup>c</sup> Censored when the child died. Otherwise, a person was assumed to have continuous enrollment.

<sup>d</sup> per 1,000 person-years

Children and their parents who were excluded from our study population were more likely to have shorter enrollment time and greater number of enrollment gaps. When we estimated incidence rates of child outcomes, children were assumed to be continuously enrolled until the end of the follow-up period or death. By using the person-years calculated with this method, we found that children excluded had lower incidence rate of injury events than the study population. We suspected that the incidence rates for the excluded children were underestimated because these children were assumed to be continuously enrolled in the health insurance program. Adding these excluded children into the study population requires intensive computation and additional assumptions. For example, we have to consider the actual enrollment time and exclude the enrollment gaps when calculating person-time at risk. Additionally, we have to assume that the probabilities of capturing child outcomes were similar between time periods of enrollment and non-enrollment in the NHI Program. This could be a false assumption since people would be more likely to participate in a health insurance program when they are less healthy. Furthermore, children excluded had lower prevalence and incidence rate of paternal SMI. This could be because fathers of these excluded children were more likely to have shorter enrollment time and missing IDs, which decreased the likelihood of capturing an exposure diagnosis.

## eMethods 4 Retrieving child’s health records under the parents’ coverage

Infants with Taiwanese citizenship can be covered by their parents’ insurance for 60 days before joining the NHI program. In this situation, the infants’ claims data are associated with their parent’s ID, instead of the infant’s ID. The following method was adopted to retrieve infants’ inpatient/outpatient data under their parents’ coverage. We first used parents’ ID, ICD-9-CM diagnosis code for newborns and neonates (760-779), coverage indicator (copayment code: 902 and 903), and the age variable ("0-14 days", "15-28 days", "29 days-less than one year") to retrieve records that belonged to infants. Then, if the visit/admission date of a record was between 30 days prior to and 90 days after the child’s birthdate, the child’s ID was assigned to that record. We used a slightly longer interval because some children couldn’t have their birthdate retrieved from the registry of beneficiaries, and the birthdates retrieved from the birth certificate only have the year and month components. The following table summarizes numbers of records retrieved from parent’s claims data and records finally assigned with a child’s ID (separated for singletons and multiples). For singleton births, most of the records were successfully assigned to a child’s ID.

### Numbers of records retrieved from parents’ data and assigned with a child’s ID

| Data sources                          |        | Records retrieved from parent’s ID | Records matched to child’s ID |            |
|---------------------------------------|--------|------------------------------------|-------------------------------|------------|
|                                       |        |                                    | Singletons                    | Multiples* |
| Ambulatory care expenditures by visit | Father | 52,495                             | 49,880                        | 2,590      |
|                                       | Mother | 3,106,795                          | 2,982,993                     | 155,200    |
| Inpatient expenditures by admission   | Father | 10,560                             | 10,140                        | 757        |
|                                       | Mother | 442,607                            | 409,284                       | 57,528     |

This table included children included in and excluded from the study cohort.

\* Figures for multiples were inflated because the records could not be assigned exactly to a child’s ID.

## **eMethods 5 Retrieval of prenatal and well-child visits**

The NHI Program offers 10 free prenatal visits; and 7 (8 before 2011) free well-child visits from 0 to 5 years: 4 visits by the age of 1, 2 at the ages of 1-2, 1 at the ages of 2-3, 1 at the ages of 3-4, and 1 at the ages of 4-6. For prenatal visits, we identified records in the ambulatory care expenditures for visits from 2003-2014 that were associated with “sequential numbers of visit” 41-60 (2003) or IC41-IC60 (2004-2014). For each mother, visits on the same day were counted once. Gestational week and child’s birthdate were retrieved from the birth certificate and registry of beneficiaries, respectively, to estimate mother’s pregnancy start date. Finally, we only kept the records with a visit date within the time period from 3 weeks prior to the pregnancy start date to the child’s birthdate. For well-child visits, we identified records in the ambulatory care expenditures for visits from 2004-2014 associated with “sequential numbers of visit” IC11-IC19 or IC71-IC79. We then used child’s birthdates to eliminate records that occurred after the age of 5 years. We then calculated numbers of prenatal and well-child visits for each child and obtained the timing of the third and fifth well-child visit.

## eMethods 6 Retrieval of covariates

Important covariates were all measured at child's birth. Potential confounders considered included birth year, child sex, birth order, parental age at child's birth, unmarried mother, maternal foreign-born status, urbanicity of residence, monthly family income, parental occupation, parental physical illness (defined by Elixhauser comorbidity index), LBW and preterm birth. Potential mediators included unmarried mother, monthly family income, parental occupation, parental physical illness, LBW and preterm birth.

### Children's characteristics

Birth year and child sex were determined by child's birthdate and sex recorded in the registry of beneficiaries. For child's IDs unlinkable to the registry of beneficiaries, we used child's birthdate and sex recorded in the birth certificate if available. Birthweight and gestational age were retrieved from the birth certificate. Birth order was measured by using the sequence in the mother-child pairs in the MCHD and/or the registry of beneficiaries of 2000-2014. For children without mother's IDs, the birth order was defined by the sequence in the father-child pairs.

### Parental demographic characteristics

Maternal and paternal ages at birth were calculated from parent's birthdate and child's birthdate recorded in the registry of beneficiaries. For parent's IDs unlinkable to the registry of beneficiaries, we used parent's birthdate recorded in the birth certificate, if available. Unmarried mother was defined by missing or unknown father's household location in the birth certificate. Maternal foreign-born status was determined by the variables: mother's original and current nationality in the birth certificate records, as well as whether a mother had a foreign ID in the registry of beneficiaries. If any of these variables indicated a non-Taiwan national status, we considered the mother as foreign-born.

### Socio-economic status

This project used four SES indicators: urbanicity of residence, monthly family income, and maternal and paternal occupation types. Mother's current residence in the birth certificate was used as the proxy of residence. Urbanicity of residence was defined with an index derived by the cluster analysis of the five variables measured for each township in 2005: population density (persons per square kilometer), proportion of people with educational levels of college or above, proportion of people > 65 years, proportion of agricultural workers, and number of physicians per 100,000 people.<sup>2</sup> The variable has seven categories with cluster 1 representing highest urbanicity and cluster 7 least urbanicity.

Monthly family income and occupation type were constructed from two variables in the registry of beneficiaries: salary (salary bands) and characteristics of the company or institution through which an enrollee joined the NHI Program. We first attempted to retrieve the data belonging to an enrollee (the father/ mother) recorded in the year of the child's birth by using enrollee's ID as the key variable. (For children born in 2011-2014, we tried to retrieve data of the birth month first). If there were no data in that year, we collected data recorded in the following year. And if using the enrollee's ID failed to retrieve a relevant record, insured's ID was taken as the key variable to retrieve data belonging to a dependent. The above algorithm generated few duplicate maternal or paternal records in terms of child's ID. For these duplicate records, we chose to keep the records by the following priorities: being retrieved by using enrollee's ID as the key variable, associated with a mother's ID that was the same as that in the birth certificate (for maternal records), and with a time point closer to the child's birth month and year. In total, 12,589 maternal records and 2,499 paternal records were removed. summarizes numbers of records retrieved by each combination of key variable and time point. Finally, 34,292 (1.5%) and 74,023 (3.4%) children with non-missing mother's and father's IDs could not have their parent's data retrieved using the above algorithm. The following table summarizes numbers of records retrieved by each combination of key variable and time point

### **Numbers of parent records of the registry of beneficiaries retrieved by each combination of key variable and time point relative to the child's birth**

| Key variable               | Time point of data     | Maternal data    | %     | Paternal data    | %     |
|----------------------------|------------------------|------------------|-------|------------------|-------|
| Enrollee's ID <sup>a</sup> | The year of childbirth | 1,654,697        | 75.14 | 1,980,166        | 94.30 |
|                            | The following year     | 97,125           | 4.41  | 51,759           | 2.46  |
| Insured's ID <sup>a</sup>  | The year of childbirth | 436,081          | 19.80 | 63,553           | 3.03  |
|                            | The following year     | 14,184           | 0.64  | 4,295            | 0.20  |
| <b>Sum</b>                 |                        | <b>2,202,087</b> |       | <b>2,099,773</b> |       |
| <b>Missing data</b>        |                        | <b>34,292</b>    |       | <b>74,023</b>    |       |

<sup>a</sup> Enrollee's ID (ID1): the person who paid for the premium; Insured's ID (ID): the person covered by an insurance policy.

This table included all the children retrieved from the MCHD and/or the registry of beneficiaries, regardless of whether they were included in the final study cohort.

If a parent was enrolled as a dependent or unemployed, we assumed the salary to be zero. Monthly family income was then calculated as the sum of parents' salary. To handle the issues that salaries were recorded as salary bands and that some occupation types had no recorded salaries, we divided monthly family income into five income groupings according to quintiles in each birth year. If one of the parents' occupation was the low-income household, and the other had missing occupation type or also belonged to the low-income household, the family income was directly classified as the lowest income group.

Maternal and paternal occupation types were classified according to the characteristics of company or institution through which an enrollee joined the NHI Program. The occupation type was divided into the following categories: (1) civil servants and teachers; (2) employees of enterprises or institutions, employers and professionals; (3) union members\*, foreign crew members, farmers, and fishermen, (4) dependents; (5) the unemployed without a working spouse and low-income households. The fourth and fifth categories represent an unemployment status with a difference in whether the insured had a working spouse or parent. In the NHI, if married people are unemployed, they must be enrolled as a dependent of the spouse. If unemployed people cannot be enrolled as a dependent, then they must join the program through a Township/District Office. The low income household status in Taiwan is approved by a local government on the basis of average monthly income for each person in the household, as well as value of movable property and real estate.<sup>3</sup>

\* Union members refers to workers of the same occupation in the same city or county who organized and participated in an occupational union. Occupational unions are initially developed as insurance agents for (1) self-employed workers or workers who have no definite employer, (2) employees working in small businesses where there are fewer than 10 employees, and (3) small business owners. The occupation types for occupational unions vary a lot, from farming, fishing, mining, transportation, tourism and catering industry, construction and engineering, news advertising industry, and culture and recreational industry, etc.

### **Parental physical illness**

We used the Elixhauser comorbidity index (EI) as a measurement for parental physical illness. The EI is comprised of 31 comorbidities defined using ICD-9-CM codes.<sup>4</sup> The EI contains several psychiatric disorders, including depression, psychoses, alcohol abuse, and drug abuse.<sup>5</sup> In this project, we removed these 4 comorbidity groups reflecting psychiatric disorders given their overlap or expected collinearity with our exposure of interest. We first identified all outpatient/inpatient data associated with parent IDs that contained ICD-9 diagnostic codes for the comorbidity groups from 13 months before to 1 month after the child's birthdate. We then excluded outpatient diagnostic codes that were reported < 3 times or that all appeared in the same month to avoid counting comorbid disorders due to miscodes. Finally, we used the claims data in the 12 months preceding the child's birthdate to generate EI. The original index does not have a scoring system, so we computed the score by summing individual categories (the presence or absence of a comorbidity).

### **Child and parental deaths**

Child and parental deaths were retrieved from the death certificate database. The death certificate database of 1998-2014 contained 2,353,997 unique IDs. A tiny proportion (0.01%) of these IDs could have been assigned to different persons. Among child's IDs, 11,778 could be linked to a death record. However, 18 records contained a date of death 30 days prior to the child's birthdate; so, we considered these 18 death records invalid. Another 1,347 records had a date of death 15 days earlier or later than the birthdate. This arose because these children did not have a birthdate retrieved from the registry of beneficiaries, and their birthdates were instead retrieved from the birth certificate database, which only have the birth year and month. For these children, we corrected the child's birthdates according to the death date.

For mother's IDs, 4,083 death records were retrieved, among which 28 records with a date of death 16 days earlier than any of the birthdates of the mother's children. For father's IDs, 13,416 death records were retrieved, among which 79 records had a date of death 300 days earlier than any of the birthdates of the father's children. We considered these 28 maternal and 79 paternal death records invalid. Finally, we generated the censored variable that was defined as any parent or child in the parent-child pairs/triad who died in the first five years of life.

**eMethods 7 Associations between childhood injury events in the first five years of life and covariates among children in the study cohort**

|                                   | Follow-up period  |                  | Unexposed period | Exposed period    |        |                   |
|-----------------------------------|-------------------|------------------|------------------|-------------------|--------|-------------------|
|                                   | Rate <sup>a</sup> | IRR (95% CI)     | Events           | Rate <sup>a</sup> | Events | Rate <sup>a</sup> |
| <b>Birth year</b>                 |                   |                  |                  |                   |        |                   |
| 2004-2007                         | 249               | ref              | 909,847          | 248               | 41,834 | 284               |
| 2008-2010                         | 265               | 1.06 (1.06-1.06) | 614,968          | 263               | 29,634 | 299               |
| 2011-2014                         | 267               | 1.07 (1.07-1.07) | 375,411          | 265               | 15,683 | 318               |
| <b>Children's characteristics</b> |                   |                  |                  |                   |        |                   |
| Child sex                         |                   |                  |                  |                   |        |                   |
| Males                             | 278               | 1.18 (1.18-1.19) | 1,072,319        | 277               | 49,097 | 319               |
| Female                            | 235               | ref              | 827,907          | 234               | 38,054 | 269               |
| Low birthweight                   |                   |                  |                  |                   |        |                   |
| No                                | 258               | ref              | 1,797,208        | 257               | 81,194 | 295               |
| Yes                               | 250               | 0.97 (0.96-0.97) | 103,018          | 248               | 5,957  | 288               |
| Preterm birth                     |                   |                  |                  |                   |        |                   |
| No                                | 257               | ref              | 1,770,453        | 256               | 79,437 | 294               |
| Yes                               | 259               | 1.01 (1.00-1.01) | 129,773          | 257               | 7,714  | 299               |
| Birth order                       |                   |                  |                  |                   |        |                   |
| 1                                 | 265               | ref              | 1,120,321        | 264               | 52,369 | 299               |
| 2                                 | 246               | 0.93 (0.93-0.93) | 627,873          | 245               | 26,663 | 287               |
| ≥3                                | 253               | 0.95 (0.95-0.96) | 152,032          | 251               | 8,119  | 295               |
| Complex chronic conditions        |                   |                  |                  |                   |        |                   |
| No                                | 256               | ref              | 1,755,568        | 254               | 79,484 | 292               |
| Yes                               | 279               | 1.09 (1.08-1.10) | 144,658          | 277               | 7,667  | 322               |
| <b>Parental characteristics</b>   |                   |                  |                  |                   |        |                   |
| Paternal age at birth (years)     |                   |                  |                  |                   |        |                   |
| <25                               | 284               | 1.10 (1.09-1.11) | 111,422          | 283               | 7,239  | 307               |
| 25-29                             | 272               | 1.05 (1.05-1.06) | 465,759          | 270               | 20,584 | 298               |
| 30-34                             | 258               | ref              | 726,231          | 256               | 29,742 | 298               |
| 35-39                             | 246               | 0.95 (0.95-0.96) | 418,228          | 244               | 19,084 | 286               |
| 40-44                             | 239               | 0.93 (0.92-0.93) | 134,101          | 236               | 7,383  | 288               |
| ≥45                               | 234               | 0.91 (0.90-0.92) | 44,485           | 231               | 3,119  | 291               |
| Maternal age at birth (years)     |                   |                  |                  |                   |        |                   |
| <20                               | 280               | 1.11 (1.10-1.12) | 39,573           | 279               | 2,607  | 303               |
| 20-24                             | 270               | 1.08 (1.07-1.08) | 286,209          | 269               | 15,700 | 297               |
| 25-29                             | 264               | 1.05 (1.05-1.05) | 689,112          | 262               | 29,880 | 300               |
| 30-34                             | 251               | ref              | 648,040          | 250               | 27,073 | 292               |
| 35-39                             | 241               | 0.96 (0.95-0.96) | 210,096          | 239               | 10,323 | 286               |
| ≥40                               | 232               | 0.92 (0.91-0.93) | 27,196           | 230               | 1,568  | 274               |
| Unmarried mother                  |                   |                  |                  |                   |        |                   |
| No                                | 257               | ref              | 1,836,620        | 256               | 81,041 | 295               |
| Yes                               | 264               | 1.02 (1.02-1.03) | 63,606           | 261               | 6,110  | 294               |
| Foreign-born mother               |                   |                  |                  |                   |        |                   |
| No                                | 261               | ref              | 1,721,710        | 259               | 78,736 | 298               |
| Yes                               | 232               | 0.89 (0.89-0.89) | 178,516          | 230               | 8,415  | 271               |
| <b>Socio-economic status</b>      |                   |                  |                  |                   |        |                   |
| Urbanicity of residence           |                   |                  |                  |                   |        |                   |
| 1 (highest urbanicity)            | 241               | ref              | 349,733          | 239               | 16,171 | 281               |
| 2                                 | 251               | 1.04 (1.04-1.05) | 597,689          | 249               | 29,224 | 286               |
| 3                                 | 258               | 1.07 (1.07-1.08) | 450,855          | 257               | 18,827 | 293               |
| 4                                 | 270               | 1.12 (1.12-1.13) | 289,694          | 269               | 13,243 | 308               |
| 5                                 | 294               | 1.22 (1.21-1.23) | 37,833           | 292               | 1,796  | 335               |
| 6                                 | 281               | 1.17 (1.16-1.18) | 74,645           | 279               | 3,630  | 329               |

|                                                       | Follow-up period  |                  | Unexposed period | Exposed period    |        |                   |
|-------------------------------------------------------|-------------------|------------------|------------------|-------------------|--------|-------------------|
|                                                       | Rate <sup>a</sup> | IRR (95% CI)     | Events           | Rate <sup>a</sup> | Events | Rate <sup>a</sup> |
| 7                                                     | 301               | 1.25 (1.24-1.26) | 99,774           | 299               | 4,260  | 348               |
| <b>Family income</b>                                  |                   |                  |                  |                   |        |                   |
| High                                                  | 243               | ref              | 365,461          | 242               | 11,981 | 281               |
| Upper-middle                                          | 256               | 1.05 (1.05-1.06) | 382,686          | 254               | 13,760 | 291               |
| Middle                                                | 267               | 1.10 (1.09-1.10) | 425,733          | 266               | 18,663 | 305               |
| Lower-middle                                          | 264               | 1.08 (1.08-1.09) | 396,612          | 262               | 20,620 | 302               |
| Low                                                   | 257               | 1.06 (1.05-1.06) | 324,574          | 255               | 21,803 | 289               |
| <b>Paternal occupation</b>                            |                   |                  |                  |                   |        |                   |
| Civil servants and teachers                           | 262               | 1.02 (1.02-1.03) | 110,160          | 261               | 4,975  | 314               |
| Employees, employers and professionals                | 257               | ref              | 1,392,376        | 255               | 57,460 | 294               |
| Union members, farmers and fishermen                  | 276               | 1.08 (1.07-1.08) | 120,627          | 274               | 6,392  | 314               |
| The unemployed and low-income households              | 250               | 0.97 (0.97-0.98) | 182,755          | 247               | 13,370 | 287               |
| Dependents                                            | 249               | 0.97 (0.96-0.98) | 64,629           | 247               | 3,581  | 277               |
| <b>Maternal occupation</b>                            |                   |                  |                  |                   |        |                   |
| Civil servants and teachers                           | 251               | 0.98 (0.97-0.98) | 102,688          | 250               | 3,872  | 295               |
| Employees, employers and professionals                | 258               | ref              | 1,156,787        | 256               | 44,934 | 294               |
| Union members, farmers and fishermen                  | 292               | 1.14 (1.13-1.14) | 79,980           | 291               | 3,914  | 337               |
| The unemployed and low-income households              | 265               | 1.03 (1.02-1.04) | 120,697          | 262               | 10,895 | 301               |
| Dependents                                            | 252               | 0.98 (0.97-0.98) | 431,072          | 250               | 23,011 | 288               |
| <b>Parental physical illness</b>                      |                   |                  |                  |                   |        |                   |
| <b>Paternal Elixhauser index</b>                      |                   |                  |                  |                   |        |                   |
| 0                                                     | 256               | ref              | 1,777,425        | 255               | 78,360 | 293               |
| 1                                                     | 277               | 1.08 (1.07-1.09) | 96,596           | 274               | 6,499  | 315               |
| >1                                                    | 278               | 1.08 (1.07-1.10) | 26,205           | 275               | 2,292  | 319               |
| <b>Maternal Elixhauser index</b>                      |                   |                  |                  |                   |        |                   |
| 0                                                     | 257               | ref              | 1,819,536        | 255               | 81,568 | 293               |
| 1                                                     | 280               | 1.09 (1.08-1.10) | 72,290           | 277               | 4,769  | 328               |
| >1                                                    | 291               | 1.14 (1.11-1.16) | 8,400            | 288               | 814    | 331               |
| <b>Death occurred in the first five years of life</b> |                   |                  |                  |                   |        |                   |
| <b>Paternal death</b>                                 |                   |                  |                  |                   |        |                   |
| No                                                    | 258               | ref              | 1,895,396        | 256               | 86,651 | 295               |
| Yes                                                   | 251               | 0.97 (0.95-1.00) | 4,830            | 247               | 500    | 299               |
| <b>Maternal death</b>                                 |                   |                  |                  |                   |        |                   |
| No                                                    | 258               | ref              | 1,898,948        | 256               | 86,896 | 295               |
| Yes                                                   | 261               | 1.01 (0.96-1.06) | 1,278            | 249               | 255    | 340               |
| <b>Child's death</b>                                  |                   |                  |                  |                   |        |                   |
| No                                                    | 258               | ref              | 1,898,966        | 256               | 87,054 | 295               |
| Yes                                                   | 266               | 1.03 (0.98-1.09) | 1,260            | 257               | 97     | 478               |
| <b>Censored</b>                                       |                   |                  |                  |                   |        |                   |
| No                                                    | 258               | ref              | 1,892,960        | 256               | 86,321 | 295               |
| Yes                                                   | 254               | 0.99 (0.97-1.01) | 7,266            | 249               | 830    | 321               |

Abbreviation: CI: Confidence intervals; IRR: unadjusted incidence rate ratio.

<sup>a</sup> Incidence rate: per 1,000 person-years. Censored when the child or any parent died.

## eMethods 8 Associations between injury hospitalization in the first five years of life and covariates among children in the study cohort

|                                   | Follow-up period  |                  | Unexposed period |                   | Exposed period |                   |
|-----------------------------------|-------------------|------------------|------------------|-------------------|----------------|-------------------|
|                                   | Rate <sup>a</sup> | IRR (95% CI)     | Events           | Rate <sup>a</sup> | Events         | Rate <sup>a</sup> |
| <b>Birth year</b>                 |                   |                  |                  |                   |                |                   |
| 2004-2007                         | 4.19              | ref              | 15,086           | 4.1               | 890            | 6                 |
| 2008-2010                         | 3.55              | 0.85 (0.83-0.87) | 8,135            | 3.5               | 522            | 5.3               |
| 2011-2014                         | 3.25              | 0.78 (0.75-0.80) | 4,522            | 3.2               | 237            | 4.8               |
| <b>Children's characteristics</b> |                   |                  |                  |                   |                |                   |
| Child sex                         |                   |                  |                  |                   |                |                   |
| Males                             | 4.28              | 1.30 (1.27-1.33) | 16,285           | 4.2               | 973            | 6.3               |
| Female                            | 3.29              | ref              | 11,458           | 3.2               | 676            | 4.8               |
| Low birthweight                   |                   |                  |                  |                   |                |                   |
| No                                | 3.75              | ref              | 25,801           | 3.7               | 1,500          | 5.5               |
| Yes                               | 4.79              | 1.28 (1.22-1.34) | 1,942            | 4.7               | 149            | 7.2               |
| Preterm birth                     |                   |                  |                  |                   |                |                   |
| No                                | 3.74              | ref              | 25,393           | 3.7               | 1,461          | 5.4               |
| Yes                               | 4.79              | 1.28 (1.23-1.33) | 2,350            | 4.7               | 188            | 7.3               |
| Birth order                       |                   |                  |                  |                   |                |                   |
| 1                                 | 3.55              | ref              | 14,805           | 3.5               | 883            | 5                 |
| 2                                 | 3.91              | 1.10 (1.08-1.13) | 9,833            | 3.8               | 571            | 6.1               |
| ≥3                                | 5.21              | 1.47 (1.41-1.52) | 3,105            | 5.1               | 195            | 7.1               |
| Complex chronic conditions        |                   |                  |                  |                   |                |                   |
| No                                | 3.64              | ref              | 24,674           | 3.6               | 1,446          | 5.3               |
| Yes                               | 5.99              | 1.64 (1.59-1.71) | 3,069            | 5.9               | 203            | 8.5               |
| <b>Parent characteristics</b>     |                   |                  |                  |                   |                |                   |
| Paternal age at birth (years)     |                   |                  |                  |                   |                |                   |
| <25                               | 5.81              | 1.66 (1.59-1.73) | 2,268            | 5.8               | 160            | 6.8               |
| 25-29                             | 4.17              | 1.19 (1.16-1.23) | 7,073            | 4.1               | 402            | 5.8               |
| 30-34                             | 3.50              | ref              | 9,747            | 3.4               | 511            | 5.1               |
| 35-39                             | 3.45              | 0.99 (0.96-1.02) | 5,802            | 3.4               | 344            | 5.2               |
| 40-44                             | 3.73              | 1.06 (1.02-1.11) | 2,053            | 3.6               | 156            | 6.1               |
| ≥45                               | 4.31              | 1.23 (1.15-1.32) | 800              | 4.2               | 76             | 7.1               |
| Maternal age at birth (years)     |                   |                  |                  |                   |                |                   |
| <20                               | 7.07              | 2.21 (2.07-2.35) | 993              | 7                 | 72             | 8.4               |
| 20-24                             | 5.32              | 1.66 (1.61-1.72) | 5,568            | 5.2               | 373            | 7.1               |
| 25-29                             | 3.87              | 1.21 (1.17-1.24) | 9,960            | 3.8               | 577            | 5.8               |
| 30-34                             | 3.20              | ref              | 8,170            | 3.2               | 432            | 4.7               |
| 35-39                             | 3.08              | 0.96 (0.92-1.00) | 2,645            | 3                 | 169            | 4.7               |
| ≥40                               | 3.49              | 1.09 (0.99-1.20) | 407              | 3.4               | 26             | 4.5               |
| Unmarried mother                  |                   |                  |                  |                   |                |                   |
| No                                | 3.73              | ref              | 26,328           | 3.7               | 1,474          | 5.4               |
| Yes                               | 6.01              | 1.61 (1.53-1.69) | 1,415            | 5.8               | 175            | 8.4               |
| Foreign-born mother               |                   |                  |                  |                   |                |                   |
| No                                | 3.71              | ref              | 24,205           | 3.6               | 1,419          | 5.4               |
| Yes                               | 4.67              | 1.26 (1.22-1.30) | 3,538            | 4.6               | 230            | 7.4               |
| <b>Socio-economic status</b>      |                   |                  |                  |                   |                |                   |
| Urbanicity of residence           |                   |                  |                  |                   |                |                   |
| 1 (highest urbanicity)            | 2.99              | ref              | 4,285            | 2.9               | 256            | 4.4               |
| 2                                 | 3.33              | 1.11 (1.07-1.15) | 7,806            | 3.3               | 499            | 4.9               |
| 3                                 | 3.73              | 1.25 (1.20-1.30) | 6,437            | 3.7               | 339            | 5.3               |
| 4                                 | 4.67              | 1.56 (1.50-1.63) | 4,942            | 4.6               | 296            | 6.9               |
| 5                                 | 5.70              | 1.91 (1.77-2.06) | 726              | 5.6               | 42             | 7.8               |
| 6                                 | 5.75              | 1.93 (1.82-2.04) | 1,513            | 5.7               | 87             | 7.9               |



|                                                       |       |                     |        |       |       |       |
|-------------------------------------------------------|-------|---------------------|--------|-------|-------|-------|
| 7                                                     | 6.25  | 2.09 (1.99-2.20)    | 4,285  | 2.9   | 256   | 4.4   |
| <b>Family income</b>                                  |       |                     |        |       |       |       |
| High                                                  | 2.51  | ref                 | 3,779  | 2.5   | 124   | 2.9   |
| Upper-middle                                          | 3.17  | 1.26 (1.21-1.32)    | 4,726  | 3.1   | 197   | 4.2   |
| Middle                                                | 4.07  | 1.62 (1.56-1.68)    | 6,397  | 4     | 376   | 6.2   |
| Lower-middle                                          | 4.09  | 1.79 (1.72-1.86)    | 6,685  | 4.4   | 426   | 6.2   |
| Low                                                   | 4.88  | 1.94 (1.87-2.02)    | 6,057  | 4.8   | 522   | 6.9   |
| <b>Paternal occupation</b>                            |       |                     |        |       |       |       |
| Civil servants and teachers                           | 2.84  | 0.80 (0.76-0.85)    | 1,190  | 2.8   | 56    | 3.5   |
| Employees, employers and professionals                | 3.54  | ref                 | 19,041 | 3.5   | 977   | 5     |
| Union members, farmers and fishermen                  | 5.52  | 1.56 (1.49-1.62)    | 2,379  | 5.4   | 159   | 7.8   |
| The unemployed and low-income households              | 4.98  | 1.40 (1.36-1.45)    | 3,555  | 4.8   | 358   | 7.7   |
| Dependents                                            | 4.24  | 1.20 (1.13-1.27)    | 1,091  | 4.2   | 72    | 5.6   |
| <b>Maternal occupation</b>                            |       |                     |        |       |       |       |
| Civil servants and teachers                           | 2.34  | 0.68 (0.64-0.73)    | 953    | 2.3   | 40    | 3     |
| Employees, employers and professionals                | 3.42  | ref                 | 15,230 | 3.4   | 745   | 4.9   |
| Union members, farmers and fishermen                  | 5.20  | 1.52 (1.44-1.60)    | 1,399  | 5.1   | 94    | 8.1   |
| The unemployed and low-income households              | 5.58  | 1.63 (1.56-1.70)    | 2,503  | 5.4   | 264   | 7.3   |
| Dependents                                            | 4.41  | 1.29 (1.26-1.32)    | 7,474  | 4.3   | 492   | 6.2   |
| <b>Parental physical illness</b>                      |       |                     |        |       |       |       |
| <b>Paternal Elixhauser index</b>                      |       |                     |        |       |       |       |
| 0                                                     | 3.77  | ref                 | 25,896 | 3.7   | 1,441 | 5.4   |
| 1                                                     | 4.28  | 1.13 (1.08-1.19)    | 1,449  | 4.1   | 145   | 7     |
| >1                                                    | 4.49  | 1.19 (1.09-1.30)    | 398    | 4.2   | 63    | 8.8   |
| <b>Maternal Elixhauser index</b>                      |       |                     |        |       |       |       |
| 0                                                     | 3.77  | ref                 | 26,442 | 3.7   | 1,531 | 5.5   |
| 1                                                     | 4.48  | 1.19 (1.12-1.26)    | 1,133  | 4.3   | 99    | 6.8   |
| >1                                                    | 5.91  | 1.57 (1.36-1.81)    | 168    | 5.8   | 19    | 7.7   |
| <b>Death occurred in the first five years of life</b> |       |                     |        |       |       |       |
| <b>Paternal death</b>                                 |       |                     |        |       |       |       |
| No                                                    | 3.80  | ref                 | 27619  | 3.73  | 1626  | 5.53  |
| Yes                                                   | 6.92  | 1.82 (1.55-2.14)    | 124    | 6.34  | 23    | 1.38  |
| <b>Maternal death</b>                                 |       |                     |        |       |       |       |
| No                                                    | 3.80  | ref                 | 27685  | 3.73  | 1634  | 5.54  |
| Yes                                                   | 12.41 | 3.27 (2.60-4.11)    | 58     | 11.31 | 15    | 20.01 |
| <b>Child's death</b>                                  |       |                     |        |       |       |       |
| No                                                    | 3.77  | ref                 | 27456  | 3.70  | 1631  | 5.52  |
| Yes                                                   | 59.77 | 15.85 (14.16-17.74) | 287    | 58.58 | 18    | 88.66 |
| <b>Censored</b>                                       |       |                     |        |       |       |       |
| No                                                    | 3.76  | ref                 | 27284  | 3.69  | 1596  | 5.45  |
| Yes                                                   | 16.09 | 4.28 (3.92-4.67)    | 459    | 15.71 | 53    | 20.47 |

Abbreviation: CI: Confidence intervals; IRR: unadjusted incidence rate ratio.

<sup>a</sup> Incidence rate: per 1,000 person-years. Censored when the child or any parent died.

## eMethods 9 Variables used for the adjustment in all models

The base model (model 1) included birth year (three-levels), child sex, child age (five age groups) and interaction terms for parental SMI and child age of exposure. In model 2, we added birth order (three-levels: 1, 2, 3+), maternal and paternal ages at child's birth (continuous variables centered at the mean), foreign-born mother, and urbanicity of residence (seven-levels). In model 3, we added unmarried mother, family income (five-levels), maternal and paternal occupations (five-levels), and maternal and paternal physical illness (defined by Elixhauser comorbidity indices; three-levels: 0, 1, >1). In model 4, we added child's LBW and preterm birth.

Unmarried mother, family income, parental occupation, parental physical illness, child's LBW and preterm birth could be confounders or mediators on the causal pathway between parental SMI and child's injury, therefore, controlling for these variables could yield models that are over-adjusted and bias the risk estimates towards the null. So, our modeling strategy was to start with adjusting for covariates that could be confounders and would not be mediators and then to add covariates that have increasing possibility of mediating effects in regression adjustments.

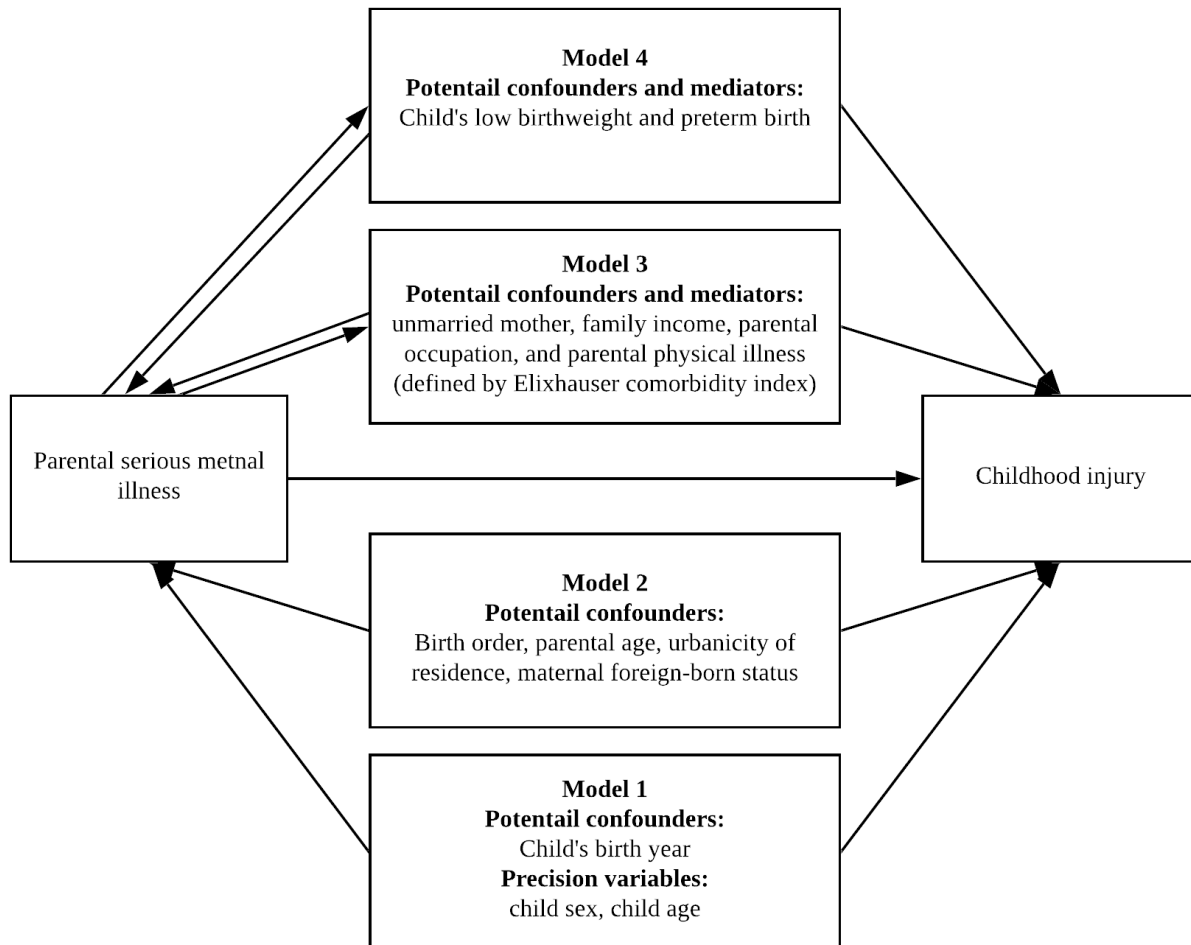

## eMethods 10 Missing data of child's birthweight, gestational age and parental demographics among children in the study cohort

Among the study cohort, 23,964 (1.2%) children had missing paternal occupation and salary, 4,482 (0.2%) missing maternal occupation and salary, 4,037 (0.2%) missing both parents' occupation data, and 14 children missing either birthplace or paternal age. Overall, 98.4% of children do not have any missing data in these variables.

| BW  | GA | Birthplace | Maternal occupation/salary | Paternal occupation / salary | Family income | Maternal age | Paternal age | Number of children | %     |
|-----|----|------------|----------------------------|------------------------------|---------------|--------------|--------------|--------------------|-------|
| X   | X  | X          | X                          | X                            | X             | X            | X            | 1,966,825          | 98.4  |
| X   | X  | X          | X                          |                              | X             | X            | X            | 23,964             | 1.2   |
| X   | X  | X          |                            | X                            | X             | X            | X            | 4,482              | 0.2   |
| X   | X  | X          |                            |                              |               | X            | X            | 4,037              | 0.2   |
| X   | X  |            | X                          | X                            | X             | X            | X            | 9                  | 0.0   |
| X   | X  | X/         | X/                         | X                            | X             | X            | X/           | 5                  | 0.0   |
| Sum |    |            |                            |                              |               |              |              | 1,999,322          | 100.0 |

Abbreviation: BW: birthweight; GA: gestational age; X: non-missing

## eMethods 11 ICD-9-CM diagnostic codes of child complex chronic conditions

| Category                           | Subcategories                                   | ICD-9-CM Codes                           |
|------------------------------------|-------------------------------------------------|------------------------------------------|
| Neuromuscular                      | Brain and spinal cord malformations             | 740.0- 742.9                             |
|                                    | Mental retardation                              | 318.0- 318.2                             |
|                                    | Central nervous system degeneration and disease | 330.0- 330.9, 334.0- 334.2, 335.0- 335.9 |
|                                    | Infantile cerebral palsy                        | 343.0- 343.9                             |
|                                    | Muscular dystrophies and myopathies             | 359.0- 359.3                             |
| Cardiovascular                     | Heart and great vessel malformations            | 745.0- 747.4                             |
|                                    | Cardiomyopathies                                | 425.0- 425.4, 429.1                      |
|                                    | Conduction disorders                            | 426.0- 427.4                             |
|                                    | Dysrhythmias                                    | 427.6- 427.9                             |
| Respiratory                        | Respiratory malformations                       | 748.0- 748.9                             |
|                                    | Chronic respiratory disease                     | 770.7                                    |
|                                    | Cystic fibrosis                                 | 277.0                                    |
| Renal                              | Congenital anomalies                            | 753.0- 753.9                             |
|                                    | Chronic renal failure                           | 585                                      |
| Gastrointestinal                   | Congenital anomalies                            | 750.3, 751.1- 751.3, 751.6- 751.9        |
|                                    | Chronic liver disease and cirrhosis             | 571.4- 571.9                             |
|                                    | Inflammatory bowel disease                      | 555.0- 556.9                             |
| Hematologic or immunologic         | Sickle cell disease                             | 282.5- 282.6                             |
|                                    | Hereditary anemias                              | 282.0- 282.4                             |
|                                    | Hereditary immunodeficiency                     | 279.00- 279.9, 288.1- 288.2, 446.1       |
|                                    | Acquired immunodeficiency                       | 0420- 0421                               |
| Metabolic                          | Amino acid metabolism                           | 270.0- 270.9                             |
|                                    | Carbohydrate metabolism                         | 271.0- 271.9                             |
|                                    | Lipid metabolism                                | 272.0- 272.9                             |
|                                    | Storage disorders                               | 277.3, 277.5                             |
|                                    | Other metabolic disorders                       | 275.0- 275.3, 277.2, 277.4               |
| Other congenital or genetic defect | Chromosomal anomalies                           | 758.0- 758.9                             |
|                                    | Bone and joint anomalies                        | 259.4, 737.3, 756.0- 756.5               |
|                                    | Diaphragm and abdominal wall                    | 553.3, 756.6- 756.7                      |
|                                    | Other congenital anomalies                      | 759.7- 759.9                             |
| Malignancy                         | Malignant neoplasms                             | 140.0- 208.9, 235.0- 239.9               |

This table was adapted from Feudtner et al.<sup>6</sup>

**eMethods 12 Number of children and any child injury event excluded in sensitivity analyses**

|                                                   | Number of children excluded (%) <sup>a</sup> | Number of events excluded (%) <sup>b</sup> |                |
|---------------------------------------------------|----------------------------------------------|--------------------------------------------|----------------|
|                                                   |                                              | Unexposed period                           | Exposed period |
| Children with complex chronic conditions          | 132,991 (6.65%)                              | 150,284 (7.89%)                            | 8,485 (9.65%)  |
| Children with a parent having multiple IDs        | 105,327 (5.27%)                              | 110,330 (5.79%)                            | 5,611 (6.38%)  |
| Children with a parental death before age 5 years | 11,181 (0.56%)                               | 6,090 (0.32%)                              | 751(0.85%)     |

<sup>a</sup> Denominator: number of children in the study cohort.

<sup>b</sup> Denominator: number of episodes in each period.

# eFigure 1 Interval between two clinical visits (in week) by injury type

Histogram of interval(week) between claims for injury by injury category- skull\_base

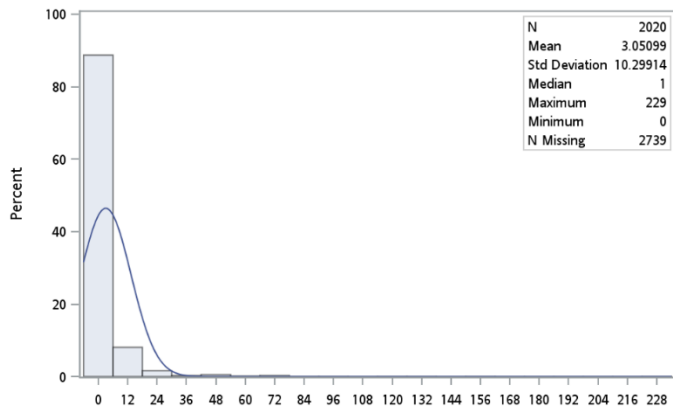

Histogram of interval(week) between claims for injury by injury category- skull

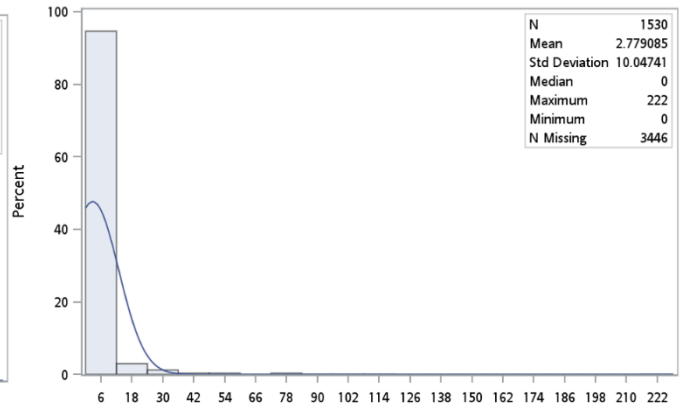

Histogram of interval(week) between claims for injury by injury category- intracranial

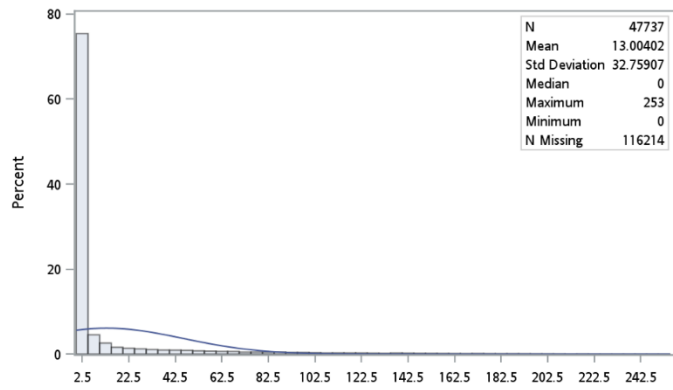

Histogram of interval(week) between claims for injury by injury category- nerve

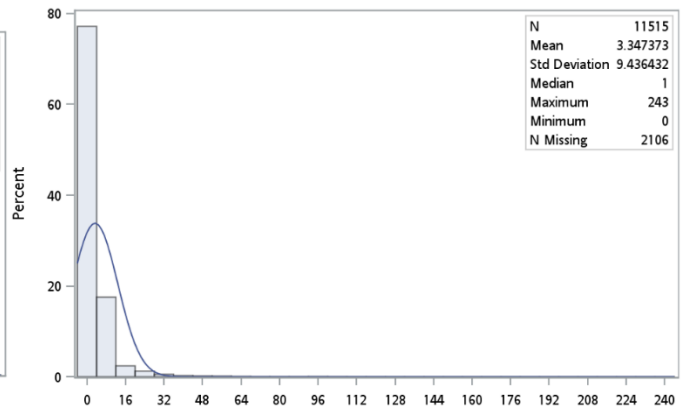

Histogram of interval(week) between claims for injury by injury category- burns

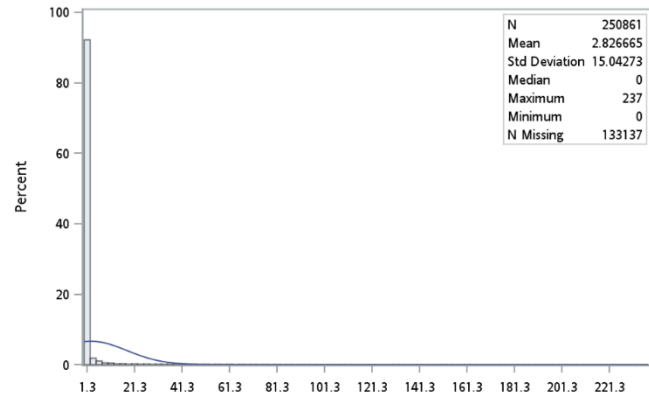

Histogram of interval(week) between claims for injury by injury category- neck

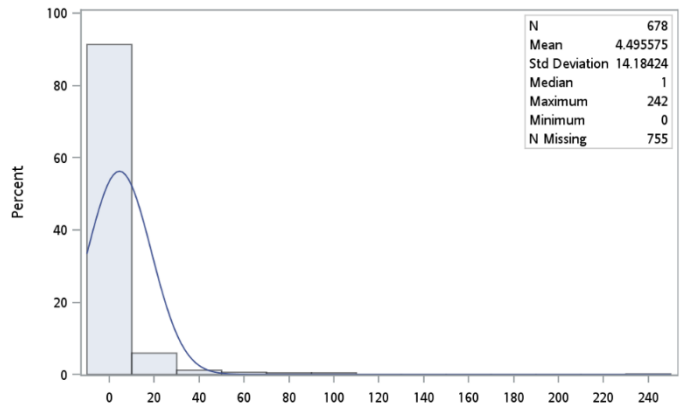

Histogram of interval(week) between claims for injury by injury category- upp\_limb

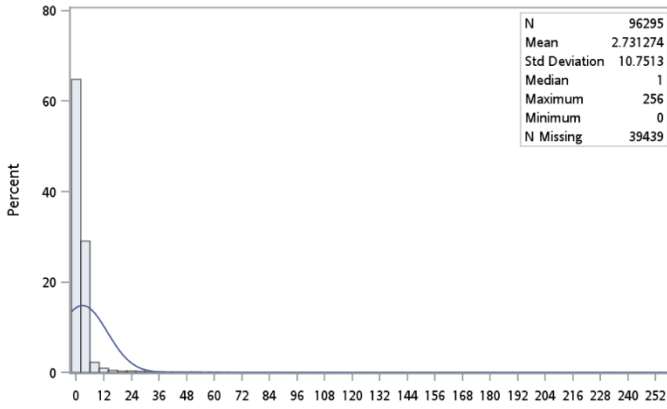

Histogram of interval(week) between claims for injury by injury category- low\_limb

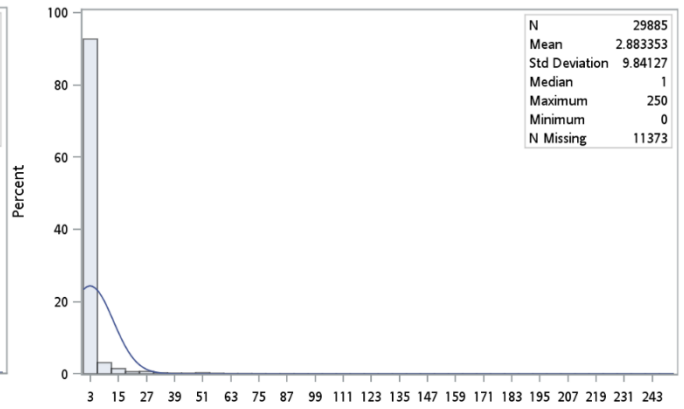

Histogram of interval(week) between claims for injury by injury category- mul\_limb

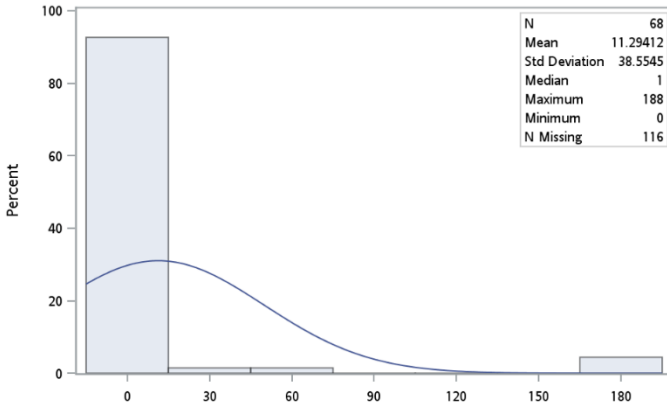

Histogram of interval(week) between claims for injury by injury category- internal

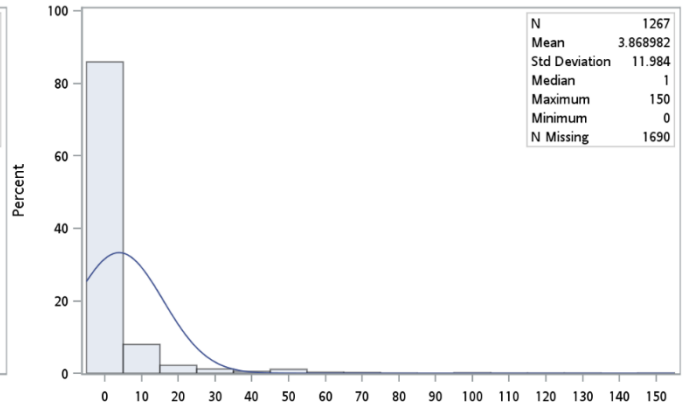

Histogram of interval(week) between claims for injury by injury category- vascular

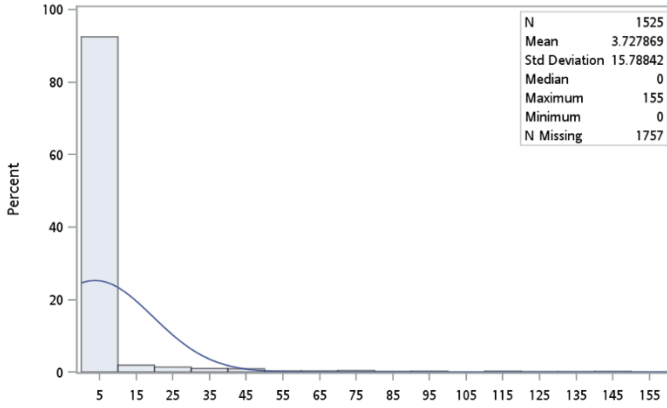

Histogram of interval(week) between claims for injury by injury category- crush

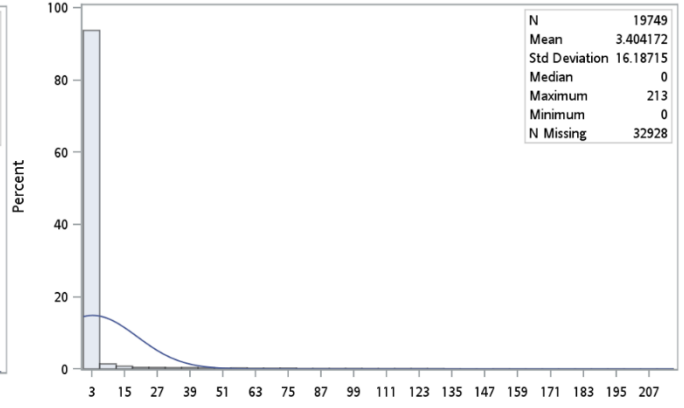

Histogram of interval(week) between claims for injury by injury category- open

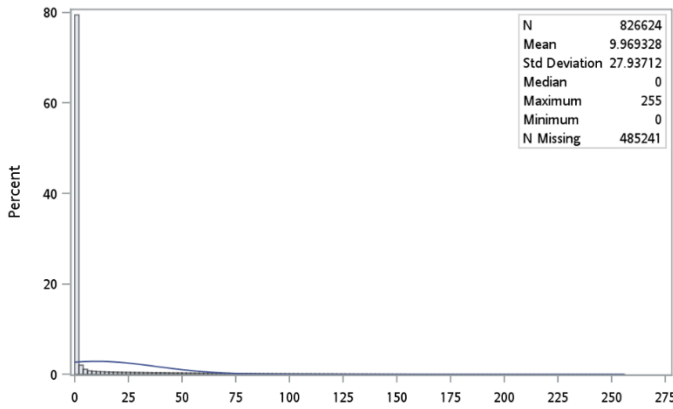

Histogram of interval(week) between claims for injury by injury category- superficial

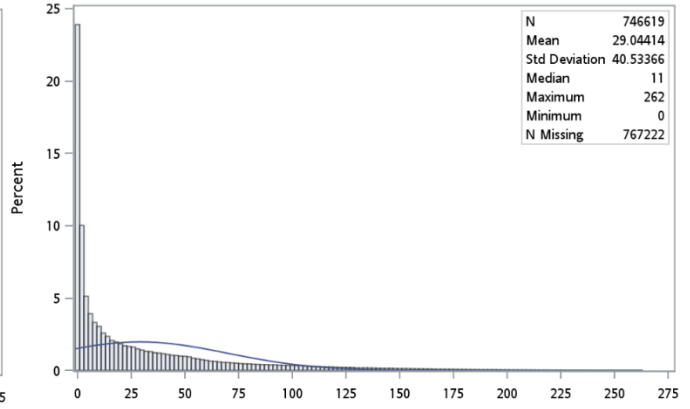

Histogram of interval(week) between claims for injury by injury category- sprains

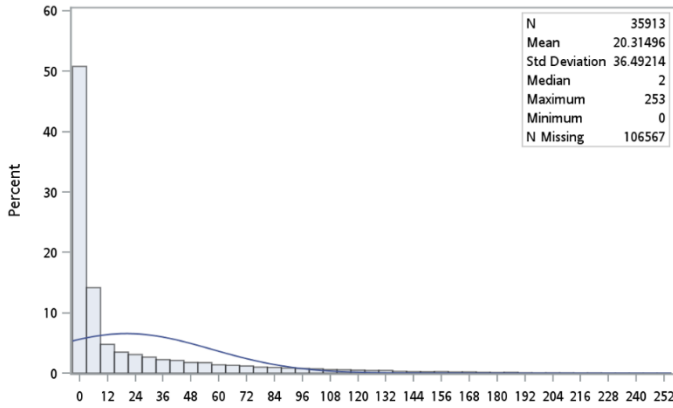

Histogram of interval(week) between claims for injury by injury category- foreign

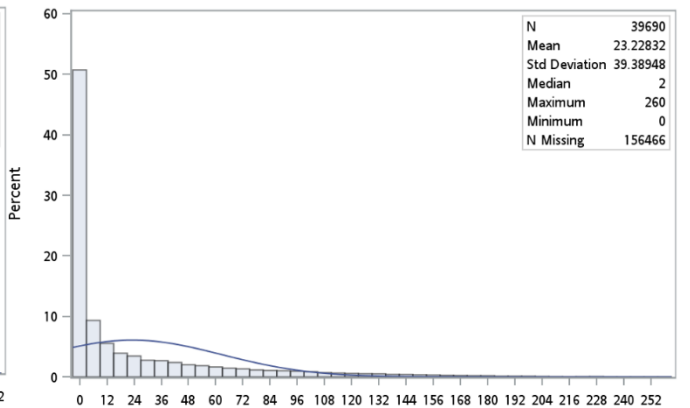

Histogram of interval(week) between claims for injury by injury category- poisoning

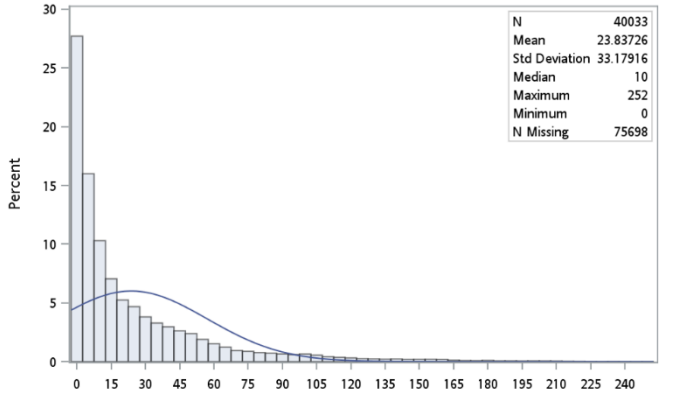



**eFigure 2 Numbers and days of enrollment gaps for children and parents in the study cohort**

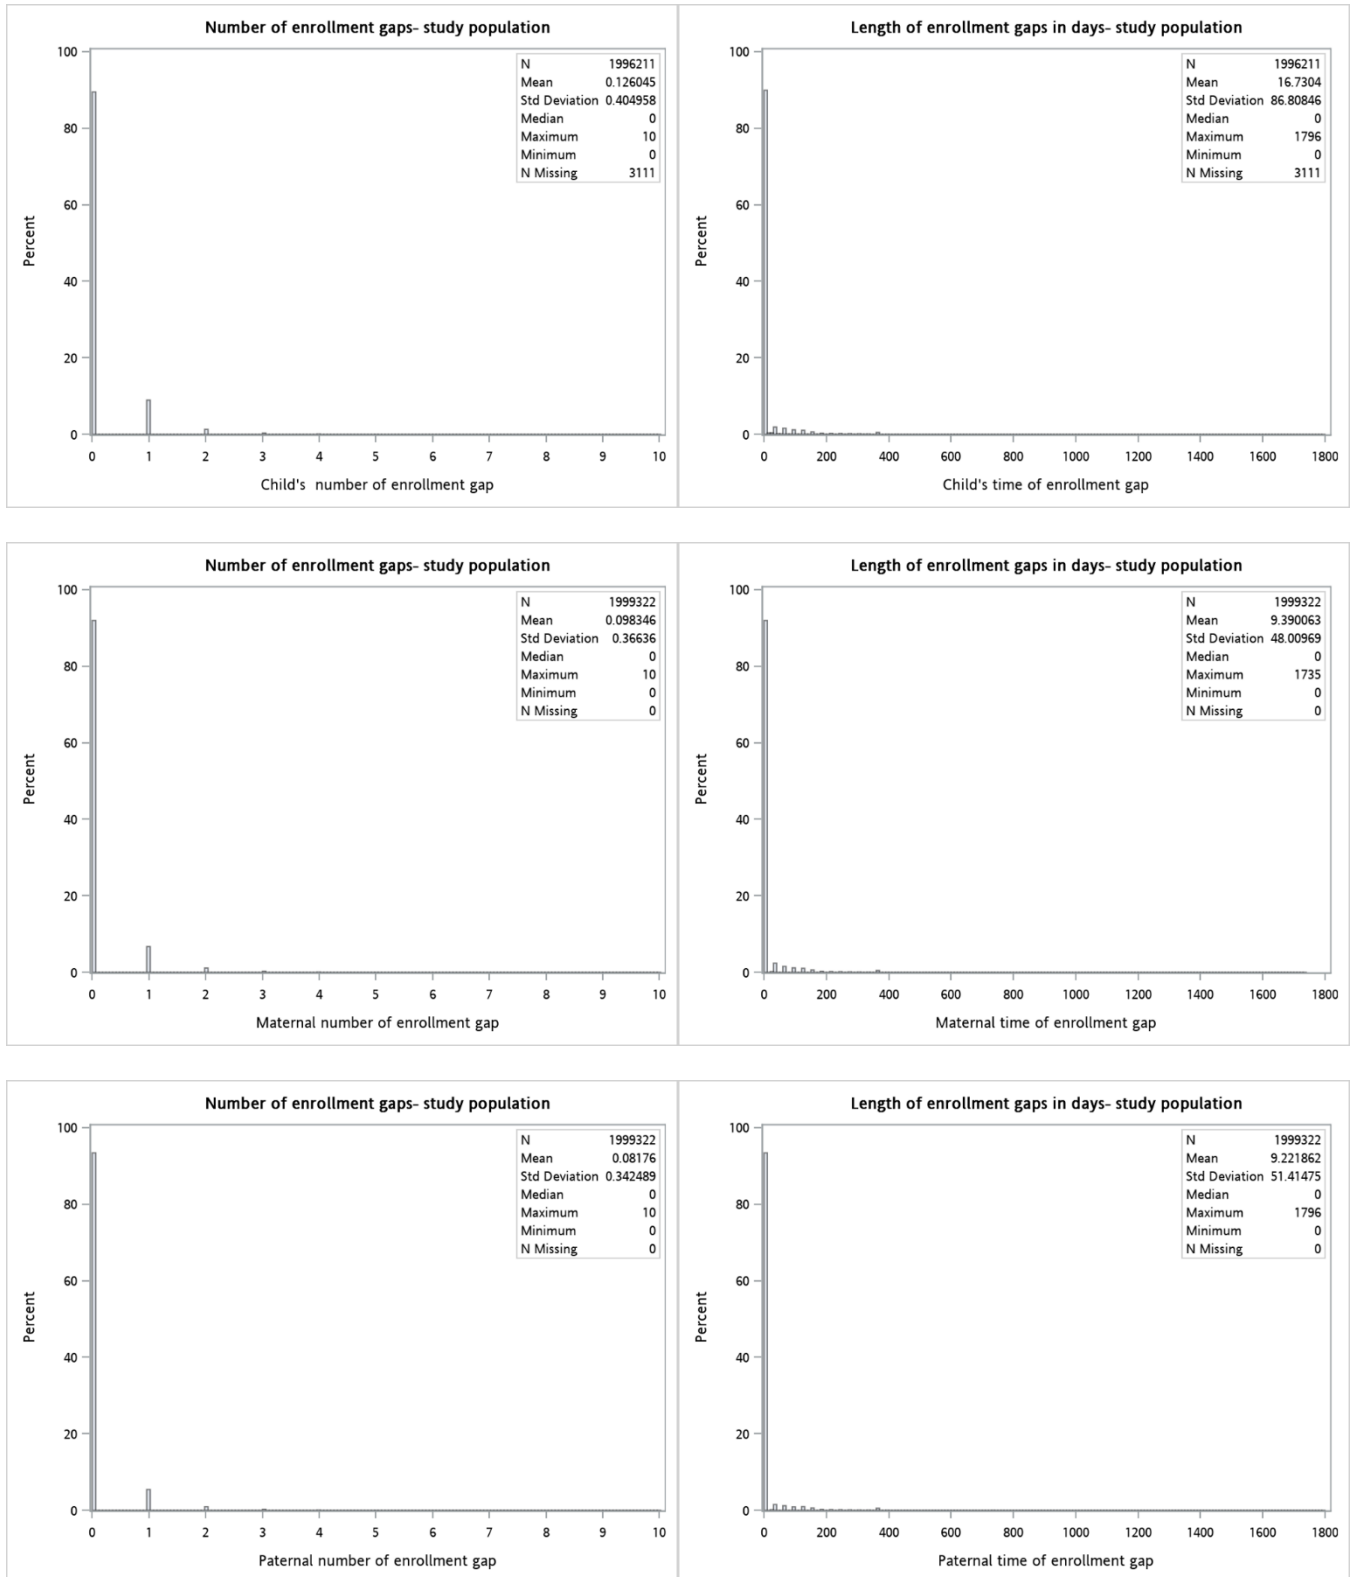

**eTable 1 Incidence rates of injury healthcare visits among children in the study cohort, stratified by child age and by exposure to parental serious mental illness**

| Age (years) | Unexposed period    |                            | Exposed period      |                            | Rate difference (95% CI) | Unadjusted IRR (95% CI) |
|-------------|---------------------|----------------------------|---------------------|----------------------------|--------------------------|-------------------------|
|             | Visits <sup>a</sup> | Rate <sup>b</sup> (95% CI) | Visits <sup>a</sup> | Rate <sup>b</sup> (95% CI) |                          |                         |
| 0-<1        | 405,152             | 218.8 (218.1-219.5)        | 15,566              | 264.8 (260.7-269.0)        | 46.0 (41.8-50.2)         | 1.21 (1.19-1.23)        |
| 1-<2        | 972,907             | 581.2 (580.0-582.3)        | 40,497              | 666.5 (660.1-673.0)        | 85.4 (78.8-92.0)         | 1.15 (1.14-1.16)        |
| 2-<3        | 826,359             | 556.8 (555.6-558.0)        | 38,937              | 638.5 (632.2-644.9)        | 81.7 (75.2-88.2)         | 1.15 (1.14-1.16)        |
| 3-<4        | 562,021             | 433.5 (432.3-434.6)        | 29,714              | 496.0 (490.4-501.7)        | 62.6 (56.8-68.3)         | 1.14 (1.13-1.16)        |
| 4-<5        | 425,239             | 374.3 (373.1-375.4)        | 24,162              | 416.5 (411.3-421.8)        | 42.2 (36.9-47.6)         | 1.11 (1.10-1.13)        |

Abbreviation: CI: Confidence intervals; IRR: incidence rate ratio.

<sup>a</sup> Visits: including injury-related outpatient/inpatient visits. Visits on the same day were counted once. Child age was determined by the age when an episode occurred.

<sup>b</sup> Incidence rate: per 1,000 person-years. The follow-up time was censored when the child died

**eTable 2 Incidence rates of injury events among children in the study cohort, stratified by child age and by exposure to parental serious mental illness for each injury type**

| Age (years)                                   | Unexposed period |                            | Exposed period |                            | Rate difference (95% CI) | Unadjusted IRR (95% CI) |
|-----------------------------------------------|------------------|----------------------------|----------------|----------------------------|--------------------------|-------------------------|
|                                               | Events           | Rate <sup>a</sup> (95% CI) | Events         | Rate <sup>a</sup> (95% CI) |                          |                         |
| <b>Fracture skull vault/base</b>              |                  |                            |                |                            |                          |                         |
| 0-<1                                          | 1,069            | 0.58 (0.54-0.61)           | 45             | 0.77 (0.57-1.03)           | 0.19 (-0.04-0.41)        | 1.33 (0.98-1.79)        |
| 1-<2                                          | 585              | 0.35 (0.32-0.38)           | 24             | 0.40 (0.26-0.59)           | 0.05 (-0.11-0.21)        | 1.13 (0.75-1.70)        |
| 2-<3                                          | 304              | 0.20 (0.18-0.23)           | 24             | 0.39 (0.26-0.59)           | 0.19 (0.03-0.35)         | 1.92 (1.27-2.91)        |
| 3-<4                                          | 235              | 0.18 (0.16-0.21)           | 15             | 0.25 (0.15-0.42)           | 0.07 (-0.06-0.2)         | 1.38 (0.82-2.33)        |
| 4-<5                                          | 193              | 0.17 (0.15-0.20)           | 15             | 0.26 (0.16-0.43)           | 0.09 (-0.04-0.22)        | 1.52 (0.90-2.57)        |
| <b>Fracture skull (apart from vault/base)</b> |                  |                            |                |                            |                          |                         |
| 0-<1                                          | 773              | 0.42 (0.39-0.45)           | 16             | 0.27 (0.17-0.44)           | -0.15 (-0.28--0.01)      | 0.65 (0.40-1.07)        |
| 1-<2                                          | 742              | 0.44 (0.41-0.48)           | 37             | 0.61 (0.44-0.84)           | 0.17 (-0.03-0.36)        | 1.37 (0.99-1.91)        |
| 2-<3                                          | 587              | 0.40 (0.36-0.43)           | 34             | 0.56 (0.40-0.78)           | 0.16 (-0.03-0.35)        | 1.41 (1.00-1.99)        |
| 3-<4                                          | 444              | 0.34 (0.31-0.38)           | 31             | 0.52 (0.36-0.74)           | 0.18 (-0.01-0.36)        | 1.51 (1.05-2.17)        |
| 4-<5                                          | 425              | 0.37 (0.34-0.41)           | 26             | 0.45 (0.31-0.66)           | 0.07 (-0.10-0.25)        | 1.20 (0.81-1.78)        |
| <b>Intracranial injury</b>                    |                  |                            |                |                            |                          |                         |
| 0-<1                                          | 30,109           | 16.26 (16.08-16.45)        | 1,429          | 24.31 (23.08-25.60)        | 8.05 (6.78-9.32)         | 1.50 (1.42-1.58)        |
| 1-<2                                          | 31,864           | 19.03 (18.83-19.24)        | 1,500          | 24.69 (23.47-25.97)        | 5.65 (4.39-6.92)         | 1.30 (1.23-1.37)        |
| 2-<3                                          | 21,734           | 14.64 (14.45-14.84)        | 1,146          | 18.79 (17.74-19.91)        | 4.15 (3.04-5.25)         | 1.28 (1.21-1.36)        |
| 3-<4                                          | 13,705           | 10.57 (10.39-10.75)        | 765            | 12.77 (11.90-13.71)        | 2.20 (1.28-3.12)         | 1.21 (1.12-1.30)        |
| 4-<5                                          | 9,256            | 8.15 (7.98-8.31)           | 602            | 10.38 (9.58-11.24)         | 2.23 (1.39-3.08)         | 1.27 (1.17-1.38)        |
| <b>Nerve and spinal cord</b>                  |                  |                            |                |                            |                          |                         |
| 0-<1                                          | 807              | 0.44 (0.41-0.47)           | 21             | 0.36 (0.23-0.55)           | -0.08 (-0.23-0.08)       | 0.82 (0.53-1.26)        |
| 1-<2                                          | 450              | 0.27 (0.25-0.29)           | 12             | 0.20 (0.11-0.35)           | -0.07 (-0.19-0.04)       | 0.73 (0.41-1.30)        |
| 2-<3                                          | 431              | 0.29 (0.26-0.32)           | 29             | 0.48 (0.33-0.68)           | 0.19 (0.01-0.36)         | 1.64 (1.12-2.38)        |
| 3-<4                                          | 282              | 0.22 (0.19-0.24)           | 11             | 0.18 (0.10-0.33)           | -0.03 (-0.15-0.08)       | 0.84 (0.46-1.54)        |
| 4-<5                                          | 235              | 0.21 (0.18-0.24)           | 15             | 0.26 (0.16-0.43)           | 0.05 (-0.08-0.19)        | 1.25 (0.74-2.11)        |
| <b>Burn</b>                                   |                  |                            |                |                            |                          |                         |
| 0-<1                                          | 13,412           | 7.24 (7.12-7.37)           | 531            | 9.03 (8.30-9.84)           | 1.79 (1.01-2.57)         | 1.25 (1.14-1.36)        |
| 1-<2                                          | 45,524           | 27.19 (26.95-27.44)        | 1,999          | 32.90 (31.49-34.38)        | 5.71 (4.24-7.17)         | 1.21 (1.16-1.27)        |
| 2-<3                                          | 34,263           | 23.09 (22.84-23.33)        | 1,794          | 29.42 (28.09-30.81)        | 6.33 (4.95-7.72)         | 1.27 (1.22-1.34)        |
| 3-<4                                          | 18,414           | 14.20 (14.00-14.41)        | 1,056          | 17.63 (16.60-18.72)        | 3.43 (2.34-4.51)         | 1.24 (1.17-1.32)        |
| 4-<5                                          | 11,523           | 10.14 (9.96-10.33)         | 690            | 11.89 (11.04-12.82)        | 1.75 (0.85-2.66)         | 1.17 (1.09-1.27)        |
| <b>Fracture- neck and trunk</b>               |                  |                            |                |                            |                          |                         |
| 0-<1                                          | 154              | 0.08 (0.07-0.10)           | 8              | 0.14 (0.07-0.27)           | 0.05 (-0.04-0.15)        | 1.64 (0.80-3.33)        |
| 1-<2                                          | 155              | 0.09 (0.08-0.11)           | 3              | 0.05 (0.02-0.15)           | -0.04 (-0.1-0.01)        | 0.53 (0.17-1.67)        |
| 2-<3                                          | 153              | 0.10 (0.09-0.12)           | 6              | 0.10 (0.04-0.22)           | 0 (-0.09-0.08)           | 0.95 (0.42-2.16)        |
| 3-<4                                          | 114              | 0.09 (0.07-0.11)           | 7              | 0.12 (0.06-0.25)           | 0.03 (-0.06-0.12)        | 1.33 (0.62-2.85)        |
| 4-<5                                          | 96               | 0.08 (0.07-0.10)           | 9              | 0.16 (0.08-0.30)           | 0.07 (-0.03-0.17)        | 1.84 (0.93-3.64)        |
| <b>Fracture- upper limb</b>                   |                  |                            |                |                            |                          |                         |
| 0-<1                                          | 5,334            | 2.88 (2.80-2.96)           | 168            | 2.86 (2.46-3.32)           | -0.02 (-0.46-0.42)       | 0.99 (0.85-1.16)        |
| 1-<2                                          | 8,086            | 4.83 (4.73-4.94)           | 316            | 5.20 (4.66-5.81)           | 0.37 (-0.21-0.95)        | 1.08 (0.96-1.20)        |
| 2-<3                                          | 8,421            | 5.67 (5.55-5.80)           | 354            | 5.81 (5.23-6.44)           | 0.13 (-0.49-0.75)        | 1.02 (0.92-1.14)        |
| 3-<4                                          | 7,503            | 5.79 (5.66-5.92)           | 367            | 6.13 (5.53-6.79)           | 0.34 (-0.30-0.98)        | 1.06 (0.95-1.18)        |
| 4-<5                                          | 6,987            | 6.15 (6.01-6.30)           | 347            | 5.98 (5.38-6.65)           | -0.17 (-0.81-0.48)       | 0.97 (0.87-1.08)        |
| <b>Fracture- lower limb</b>                   |                  |                            |                |                            |                          |                         |
| 0-<1                                          | 932              | 0.50 (0.47-0.54)           | 46             | 0.78 (0.59-1.04)           | 0.28 (0.05-0.51)         | 1.55 (1.16-2.09)        |
| 1-<2                                          | 2,327            | 1.39 (1.33-1.45)           | 81             | 1.33 (1.07-1.66)           | -0.06 (-0.35-0.24)       | 0.96 (0.77-1.20)        |
| 2-<3                                          | 2,989            | 2.01 (1.94-2.09)           | 148            | 2.43 (2.07-2.85)           | 0.41 (0.02-0.81)         | 1.21 (1.02-1.42)        |
| 3-<4                                          | 2,245            | 1.73 (1.66-1.80)           | 120            | 2.00 (1.68-2.40)           | 0.27 (-0.09-0.64)        | 1.16 (0.96-1.39)        |
| 4-<5                                          | 1,959            | 1.72 (1.65-1.80)           | 118            | 2.03 (1.70-2.44)           | 0.31 (-0.06-0.68)        | 1.18 (0.98-1.42)        |

| Age (years)                               | Unexposed period |                            | Exposed period |                            | Rate difference (95% CI) | Unadjusted IRR (95% CI) |
|-------------------------------------------|------------------|----------------------------|----------------|----------------------------|--------------------------|-------------------------|
|                                           | Events           | Rate <sup>a</sup> (95% CI) | Events         | Rate <sup>a</sup> (95% CI) |                          |                         |
| <b>Multiple fractures of limbs</b>        |                  |                            |                |                            |                          |                         |
| 0-<1                                      | 49               | 0.03 (0.02-0.04)           | 0              | 0                          |                          |                         |
| 1-<2                                      | 47               | 0.03 (0.02-0.04)           | 0              | 0                          |                          |                         |
| 2-<3                                      | 10               | 0.007 (0.004-0.013)        | 0              | 0                          |                          |                         |
| 3-<4                                      | 3                | 0.002 (0.001-0.007)        | 0              | 0                          |                          |                         |
| 4-<5                                      | 6                | 0.005 (0.002-0.012)        | 0              | 0                          |                          |                         |
| <b>Internal trauma</b>                    |                  |                            |                |                            |                          |                         |
| 0-<1                                      | 295              | 0.16 (0.14-0.18)           | 19             | 0.32 (0.21-0.51)           | 0.16 (0.02-0.31)         | 2.03 (1.28-3.23)        |
| 1-<2                                      | 351              | 0.21 (0.19-0.23)           | 20             | 0.33 (0.21-0.51)           | 0.12 (-0.03-0.27)        | 1.57 (1.00-2.46)        |
| 2-<3                                      | 316              | 0.21 (0.19-0.24)           | 19             | 0.31 (0.20-0.49)           | 0.10 (-0.04-0.24)        | 1.46 (0.92-2.32)        |
| 3-<4                                      | 290              | 0.22 (0.20-0.25)           | 17             | 0.28 (0.18-0.46)           | 0.06 (-0.08-0.20)        | 1.27 (0.78-2.07)        |
| 4-<5                                      | 249              | 0.22 (0.19-0.25)           | 16             | 0.28 (0.17-0.45)           | 0.06 (-0.08-0.19)        | 1.26 (0.76-2.09)        |
| <b>Vascular injury</b>                    |                  |                            |                |                            |                          |                         |
| 0-<1                                      | 424              | 0.23 (0.21-0.25)           | 9              | 0.15 (0.08-0.29)           | -0.08 (-0.18-0.03)       | 0.67 (0.35-1.29)        |
| 1-<2                                      | 528              | 0.32 (0.29-0.34)           | 16             | 0.26 (0.16-0.43)           | -0.05 (-0.18-0.08)       | 0.83 (0.51-1.37)        |
| 2-<3                                      | 312              | 0.21 (0.19-0.23)           | 20             | 0.33 (0.21-0.51)           | 0.12 (-0.03-0.26)        | 1.56 (0.99-2.45)        |
| 3-<4                                      | 209              | 0.16 (0.14-0.18)           | 19             | 0.32 (0.20-0.50)           | 0.16 (0.01-0.30)         | 1.97 (1.23-3.15)        |
| 4-<5                                      | 148              | 0.13 (0.11-0.15)           | 17             | 0.29 (0.18-0.47)           | 0.16 (0.02-0.30)         | 2.25 (1.36-3.72)        |
| <b>Crush injury</b>                       |                  |                            |                |                            |                          |                         |
| 0-<1                                      | 1,766            | 0.95 (0.91-1.00)           | 77             | 1.31 (1.05-1.64)           | 0.36 (0.06-0.65)         | 1.37 (1.09-1.73)        |
| 1-<2                                      | 8,764            | 5.24 (5.13-5.35)           | 360            | 5.93 (5.34-6.57)           | 0.69 (0.07-1.31)         | 1.13 (1.02-1.26)        |
| 2-<3                                      | 8,400            | 5.66 (5.54-5.78)           | 392            | 6.43 (5.82-7.10)           | 0.77 (0.12-1.42)         | 1.14 (1.03-1.26)        |
| 3-<4                                      | 6,072            | 4.68 (4.57-4.80)           | 313            | 5.23 (4.68-5.84)           | 0.54 (-0.05-1.13)        | 1.12 (1.00-1.25)        |
| 4-<5                                      | 4,275            | 3.76 (3.65-3.88)           | 242            | 4.17 (3.68-4.73)           | 0.41 (-0.13-0.95)        | 1.11 (0.97-1.26)        |
| <b>Open wounds</b>                        |                  |                            |                |                            |                          |                         |
| 0-<1                                      | 35,729           | 19.3 (19.1-19.5)           | 1,455          | 24.75 (23.51-26.06)        | 5.46 (4.17-6.75)         | 1.28 (1.22-1.35)        |
| 1-<2                                      | 154,020          | 92.00 (91.55-92.46)        | 6,595          | 108.55 (105.96-111.20)     | 16.54 (13.88-19.20)      | 1.18 (1.15-1.21)        |
| 2-<3                                      | 145,398          | 97.97 (97.47-98.48)        | 6,868          | 112.63 (109.99-115.32)     | 14.65 (11.94-17.36)      | 1.15 (1.12-1.18)        |
| 3-<4                                      | 106,281          | 81.97 (81.48-82.46)        | 5,589          | 93.30 (90.89-95.78)        | 11.33 (8.83-13.83)       | 1.14 (1.11-1.17)        |
| 4-<5                                      | 77,511           | 68.22 (67.74-68.70)        | 4,433          | 76.41 (74.2-78.7)          | 8.19 (5.89-10.49)        | 1.12 (1.09-1.15)        |
| <b>Superficial injuries and contusion</b> |                  |                            |                |                            |                          |                         |
| 0-<1                                      | 186,262          | 100.59 (100.14-101.05)     | 6,978          | 118.72 (115.96-121.53)     | 18.12 (15.30-20.95)      | 1.18 (1.15-1.21)        |
| 1-<2                                      | 296,918          | 177.36 (176.73-178.00)     | 11,951         | 196.70 (193.21-200.26)     | 19.34 (15.75-22.92)      | 1.11 (1.09-1.13)        |
| 2-<3                                      | 210,211          | 141.64 (141.04-142.25)     | 9,723          | 159.44 (156.31-162.64)     | 17.80 (14.57-21.03)      | 1.13 (1.10-1.15)        |
| 3-<4                                      | 140,933          | 108.70 (108.13-109.26)     | 7,407          | 123.65 (120.86-126.50)     | 14.95 (12.08-17.83)      | 1.14 (1.11-1.16)        |
| 4-<5                                      | 109,548          | 96.42 (95.85-96.99)        | 6,278          | 108.22 (105.57-110.93)     | 11.80 (9.06-14.54)       | 1.12 (1.09-1.15)        |
| <b>Dislocations, strains, and sprains</b> |                  |                            |                |                            |                          |                         |
| 0-<1                                      | 9,721            | 5.25 (5.15-5.36)           | 366            | 6.23 (5.62-6.90)           | 0.98 (0.33-1.62)         | 1.19 (1.07-1.32)        |
| 1-<2                                      | 27,289           | 16.3 (16.11-16.5)          | 1,000          | 16.46 (15.47-17.51)        | 0.16 (-0.88-1.20)        | 1.01 (0.95-1.08)        |
| 2-<3                                      | 28,741           | 19.37 (19.14-19.59)        | 1,277          | 20.94 (19.82-22.12)        | 1.57 (0.40-2.74)         | 1.08 (1.02-1.14)        |
| 3-<4                                      | 19,370           | 14.94 (14.73-15.15)        | 958            | 15.99 (15.01-17.04)        | 1.05 (0.02-2.09)         | 1.07 (1.00-1.14)        |
| 4-<5                                      | 16,804           | 14.79 (14.57-15.02)        | 915            | 15.77 (14.78-16.83)        | 0.98 (-0.06-2.03)        | 1.07 (1.00-1.14)        |
| <b>Foreign body</b>                       |                  |                            |                |                            |                          |                         |
| 0-<1                                      | 13,272           | 7.17 (7.05-7.29)           | 473            | 8.05 (7.35-8.81)           | 0.88 (0.14-1.61)         | 1.12 (1.02-1.23)        |
| 1-<2                                      | 26,072           | 15.57 (15.39-15.76)        | 1,160          | 19.09 (18.02-20.22)        | 3.52 (2.40-4.63)         | 1.23 (1.16-1.30)        |
| 2-<3                                      | 40,820           | 27.51 (27.24-27.77)        | 1,831          | 30.03 (28.68-31.43)        | 2.52 (1.12-3.92)         | 1.09 (1.04-1.14)        |

| Age (years)      | Unexposed period |                            | Exposed period |                            | Rate difference (95% CI) | Unadjusted IRR (95% CI) |
|------------------|------------------|----------------------------|----------------|----------------------------|--------------------------|-------------------------|
|                  | Events           | Rate <sup>a</sup> (95% CI) | Events         | Rate <sup>a</sup> (95% CI) |                          |                         |
| 3-<4             | 36,911           | 28.47 (28.18-28.76)        | 1,837          | 30.67 (29.30-32.10)        | 2.20 (0.77-3.63)         | 1.08 (1.03-1.13)        |
| 4-<5             | 29,804           | 26.23 (25.94-26.53)        | 1,594          | 27.48 (26.16-28.86)        | 1.25 (-0.14-2.63)        | 1.05 (1.00-1.10)        |
| <b>Poisoning</b> |                  |                            |                |                            |                          |                         |
| 0-<1             | 20,257           | 10.94 (10.79-11.09)        | 752            | 12.79 (11.91-13.74)        | 1.85 (0.93-2.78)         | 1.17 (1.09-1.26)        |
| 1-<2             | 28,692           | 17.14 (16.94-17.34)        | 1,268          | 20.87 (19.75-22.05)        | 3.73 (2.57-4.90)         | 1.22 (1.15-1.29)        |
| 2-<3             | 15,978           | 10.77 (10.6-10.93)         | 823            | 13.50 (12.60-14.45)        | 2.73 (1.79-3.67)         | 1.25 (1.17-1.34)        |
| 3-<4             | 8,568            | 6.61 (6.47-6.75)           | 511            | 8.53 (7.82-9.30)           | 1.92 (1.17-2.67)         | 1.29 (1.18-1.41)        |
| 4-<5             | 5,667            | 4.99 (4.86-5.12)           | 321            | 5.53 (4.96-6.17)           | 0.55 (-0.07-1.16)        | 1.11 (0.99-1.24)        |

Abbreviation: CI: Confidence intervals. IRR: Incidence rate ratio

<sup>a</sup> Incidence rate: per 1,000 person-years. Censored when the child died. Otherwise, a person was assumed to have continuous enrolment.

**eTable 3 Sensitivity analyses of associations between parental serious mental illness and any childhood injury event**

| Child age (years)                                                  | Adjusted incidence rate ratio (95% confidence intervals) |                  |                  |
|--------------------------------------------------------------------|----------------------------------------------------------|------------------|------------------|
|                                                                    | Model 1                                                  | Model 2          | Model 3          |
| <b>Excluding children with complex chronic conditions</b>          |                                                          |                  |                  |
| 0-<1                                                               | 1.21 (1.18-1.23)                                         | 1.20 (1.18-1.22) | 1.20 (1.18-1.22) |
| 1-<2                                                               | 1.14 (1.12-1.16)                                         | 1.13 (1.12-1.15) | 1.13 (1.12-1.15) |
| 2-<3                                                               | 1.14 (1.12-1.16)                                         | 1.13 (1.11-1.15) | 1.13 (1.11-1.15) |
| 3-<4                                                               | 1.13 (1.11-1.15)                                         | 1.13 (1.11-1.14) | 1.13 (1.11-1.14) |
| 4-<5                                                               | 1.10 (1.08-1.12)                                         | 1.10 (1.08-1.12) | 1.10 (1.08-1.12) |
| <b>Excluding children with a parent having multiple IDs</b>        |                                                          |                  |                  |
| 0-<1                                                               | 1.20 (1.18-1.22)                                         | 1.19 (1.17-1.22) | 1.19 (1.17-1.22) |
| 1-<2                                                               | 1.14 (1.12-1.16)                                         | 1.13 (1.12-1.15) | 1.13 (1.12-1.15) |
| 2-<3                                                               | 1.14 (1.12-1.16)                                         | 1.13 (1.12-1.15) | 1.13 (1.11-1.15) |
| 3-<4                                                               | 1.13 (1.11-1.15)                                         | 1.12 (1.10-1.14) | 1.12 (1.10-1.14) |
| 4-<5                                                               | 1.12 (1.10-1.14)                                         | 1.11 (1.09-1.13) | 1.11 (1.09-1.13) |
| <b>Excluding children with a parental death before age 5 years</b> |                                                          |                  |                  |
| 0-<1                                                               | 1.20 (1.18-1.23)                                         | 1.20 (1.18-1.22) | 1.20 (1.17-1.22) |
| 1-<2                                                               | 1.14 (1.13-1.16)                                         | 1.13 (1.12-1.15) | 1.13 (1.12-1.15) |
| 2-<3                                                               | 1.14 (1.13-1.16)                                         | 1.13 (1.12-1.15) | 1.14 (1.12-1.15) |
| 3-<4                                                               | 1.13 (1.11-1.15)                                         | 1.12 (1.10-1.14) | 1.12 (1.10-1.14) |
| 4-<5                                                               | 1.11 (1.09-1.13)                                         | 1.10 (1.08-1.12) | 1.10 (1.08-1.13) |

Model 1: adjusted for birth year, child sex, child age, birth order, maternal and paternal ages, foreign-born mother, and urbanicity of residence.

Model 2: adjusted for the above variables and unmarried mother, family income, maternal and paternal occupations, and maternal and paternal Elixhauser indexes.

Model 3: adjusted for the above variables and child's LBW and preterm birth.

**eTable 4 ICD-9 E codes for individual hospitalization associated with injury ICD-9 diagnostic codes**

| <b>External causes</b>                                                             | <b>ICD-9-CM E codes</b> | <b>N</b>      | <b>%</b>   |
|------------------------------------------------------------------------------------|-------------------------|---------------|------------|
| Accidental falls                                                                   | E880- E888              | 6,169         | 28.6       |
| Transport accidents                                                                | E800- E849              | 3,791         | 17.6       |
| Accident caused by hot substance or object caustic or corrosive material and steam | E924                    | 3,717         | 17.2       |
| Accidental poisoning                                                               | E850- E869              | 1,496         | 6.9        |
| Accidents caused by submersion, suffocation, and foreign bodies                    | E910- E915              | 1,255         | 5.8        |
| Other and unspecified environmental and accidental causes                          | E928                    | 1,216         | 5.6        |
| Striking against or struck accidentally by objects or persons                      | E917                    | 623           | 2.9        |
| Accidents caused by cutting and piercing instruments or objects                    | E920                    | 549           | 2.5        |
| Caught accidentally in or between objects                                          | E918                    | 329           | 1.5        |
| Homicide and injury purposely inflicted by other persons                           | E960- E969              | 215           | 1.0        |
| Accidents caused by machinery                                                      | E919                    | 193           | 0.9        |
| Accidents caused by fire and flames                                                | E890- E899              | 146           | 0.7        |
| Suicide and self-inflicted injury                                                  | E950- E959              | 0             | 0.0        |
| Other                                                                              |                         | 1864          | 8.6        |
| <b>Sum</b>                                                                         |                         | <b>20,057</b> | <b>100</b> |

E-codes are only mandatory to be reported in traffic accidents. Only about 70% of injury-related hospitalizations had E-codes reported.

**eTable 5 ICD-9 external causes of injury deaths**

| External causes                                                 | ICD-9-CM E codes | ICD-10 codes                   | N          | %          |
|-----------------------------------------------------------------|------------------|--------------------------------|------------|------------|
| Accidents caused by submersion, suffocation, and foreign bodies | E910- E915       | W65-W84,                       | 385        | 45         |
| Transport accidents                                             | E800- E849       | V01-V99                        | 194        | 23         |
| Accidental falls                                                | E880- E888       | W00-W19                        | 70         | 8          |
| Homicide and injury purposely inflicted by other persons        | E960- E969       | X85-Y09                        | 66         | 8          |
| Other accidents                                                 | E916-E28         | W49-W64,<br>W85-W99<br>X50-X59 | 48         | 6          |
| Accidents caused by fire and flames                             | E890- E899       | X00-X19                        | 36         | 4          |
| Accidents due to natural and environmental factors              | E900- E909       | X20-X39                        | 23         | 3          |
| Activity                                                        | E001- E030       | W20-W64                        | 18         | 2          |
| Undetermined                                                    | E980- E989       | Y10-Y34                        | 11         | 1          |
| Accidental poisoning                                            | E850- E869       | X40-X49                        | 5          | 1          |
| Suicide and self-inflicted injury                               | E950- E959       | X60-X84                        | 0          | 0          |
| <b>Sum</b>                                                      |                  |                                | <b>856</b> | <b>100</b> |

Children in the study cohort had 878 injury deaths (824 retrieved from death certificate and 176 from inpatient data).  
Missing E code: 22 (2.5%)



**eTable 6 Utilization of preventive health services among children in the study cohort born in 2004-2009**

|                                  | Without parental SMI <sup>a</sup> (N=1,068,926) |           |                | With parental SMI <sup>a</sup> (N=57,327) |           |               |
|----------------------------------|-------------------------------------------------|-----------|----------------|-------------------------------------------|-----------|---------------|
|                                  | Mean                                            | SD        |                | Mean                                      | SD        |               |
| Prenatal visits (n)              | 8.17                                            | 2.47      |                | 8.09                                      | 2.50      |               |
| Well-child visits (n)            | 5.80                                            | 2.21      |                | 5.70                                      | 2.24      |               |
|                                  | Median                                          | IQR       | Missing (%)    | Median                                    | IQR       | Missing (%)   |
| Days to the 3rd well-child visit | 229                                             | 186-376   | 92,621 (8.6)   | 240                                       | 186-382   | 5,377 (9.4)   |
| Days to the 5th well-child visit | 552                                             | 386-759   | 256,152 (24.0) | 553                                       | 389-771   | 14,822 (25.6) |
| Correlation between              | Pearson r                                       | 95% CI    |                | Pearson r                                 | 95% CI    |               |
| number of injury events and      |                                                 |           |                |                                           |           |               |
| Number of prenatal visits        | 0.04                                            | 0.04-0.04 |                | 0.03                                      | 0.02-0.07 |               |
| Number of well-child visits      | 0.08                                            | 0.08-0.08 |                | 0.08                                      | 0.07-0.09 |               |

Abbreviation: SMI: serious mental illness; SD: standard deviation; IQR: interquartile range; CI: confidence intervals

<sup>a</sup> At least one parent with SMI in the period from 6 years prior to childbirth to 5 years following childbirth.

## eReferences

1. Li C-Y, Chen L-H, Chiou M-J, Liang F-W, Lu T-H. Set-up and future applications of the Taiwan Maternal and Child Health Database (TMCHD). *Taiwan Gong Gong Wei Sheng Za Zhi*. 2016;35(2):209-221. doi:10.6288/TJPH201635104053
2. Liu C-Y, Hung Y-T, Chuang Y-L, Chen Y-J, Weng W-S, Liu J-S. Incorporating Development Stratification of Taiwan Townships into Sampling Design of Large Scale Health Interview Survey. *J Health Manag*. 2006;4(1):1-22.
3. 中華民國衛生福利部. 社會救助及社工司 - 常見問答. 中華民國衛生福利部. 2017.
4. Manitoba Centre for Health Policy Concept: Elixhauser Comorbidity Index. <http://mchp-appserv.cpe.umanitoba.ca/viewConcept.php?conceptID=1436>.
5. Quan H, Sundararajan V, Halfon P, et al. Coding Algorithms for Defining Comorbidities in ICD-9-CM and ICD-10 Administrative Data. *Med Care*. 2005;43(11):1130-1139. doi:10.1097/01.mlr.0000182534.19832.83
6. Feudtner C, Christakis DA, Connell FA. Pediatric deaths attributable to complex chronic conditions: a population-based study of Washington State, 1980-1997. *Pediatrics*. 2000;106(1 Pt 2):205-209. doi:10.1542/peds.106.1.S1.205
